# Supplementary material for: Patient-tailored antithrombotic therapy following percutaneous coronary intervention
Source: PubMed Central journal article supplement — Eur Heart J. 2021 Jan 29;42(10):1038–46. doi: 10.1093/eurheartj/ehaa1097 (PMC8244639; doi:10.1093/eurheartj/ehaa1097), 2021-01-29
Supplement: ehaa1097_supplementary_data.pdf [file ehaa1097_supplementary_data.pdf]

## **Supplementary Appendix**

### **Patient-tailored antithrombotic therapy following percutaneous coronary intervention**

**Authors:** Niels MR van der Sangen, MD<sup>1</sup>; Rik Rozemeijer, MD, PharmD, PhD<sup>2</sup>; Dean RPP Chan Pin Yin, MD<sup>3</sup>; Marco Valgimigli, MD, PhD<sup>4,5</sup>; Stephan Windecker, MD<sup>5</sup>; Stefan K James, MD, PhD<sup>6</sup>; Sergio Buccheri, MD<sup>6</sup>; Jurriën M ten Berg, MD, PhD<sup>3,7</sup>; José PS Henriques, MD, PhD<sup>1</sup>; Michiel Voskuil, MD, PhD<sup>2</sup>; Wouter J Kikkert, MD, PhD<sup>8</sup>

#### **Affiliations:**

<sup>1</sup> Department of Cardiology, Amsterdam UMC, University of Amsterdam, Amsterdam Cardiovascular Sciences, Amsterdam, The Netherlands

<sup>2</sup> Department of Cardiology, University Medical Center Utrecht, Utrecht, The Netherlands

<sup>3</sup> Department of Cardiology, St. Antonius Hospital, Nieuwegein, The Netherlands

<sup>4</sup> Cardiocentro Ticino, Lugano, Switzerland

<sup>5</sup> Department of Cardiology, Bern University Hospital, Bern, Switzerland

<sup>6</sup> Department of Medical Sciences and Uppsala Clinical Research Center, Uppsala University, Sweden

<sup>7</sup> Department of Cardiology, University Medical Center Maastricht, Maastricht, The Netherlands

<sup>8</sup> Department of Cardiology, Onze Lieve Vrouwe Gasthuis, Amsterdam, The Netherlands

#### **Address for correspondence:**

Dr. Wouter J. Kikkert, MD, PhD

Department of Cardiology, Onze Lieve Vrouwe Gasthuis, Oosterparkstraat 9, 1091 AC, Amsterdam,

The Netherlands, phone: +31 20 599 2379, e-mail: [w.j.kikkert@olvg.nl](mailto:w.j.kikkert@olvg.nl).

**Supplementary Table 1.** Randomized controlled trials comparing shortened with standard or extended duration of dual antiplatelet therapy

| Study (year)                    | DAPT duration | Sample Size | Primary Endpoint                                                                        | Secondary Endpoint                                               | Randomization and Design                                                            | ACS  | Primary and Secondary Results (shortened vs. standard DAPT)       |
|---------------------------------|---------------|-------------|-----------------------------------------------------------------------------------------|------------------------------------------------------------------|-------------------------------------------------------------------------------------|------|-------------------------------------------------------------------|
| RESET <sup>1</sup> (2012)       | 3 vs. 12 mo.  | 2,117       | Cardiac death, MI, ST, revascularization or bleeding at 1 year                          | Major or minor bleeding at 1 year                                | Randomization at time of PCI; Open-label, non-inferiority study                     | 55%  | 4.7% vs. 4.7% (P <sub>NI</sub> <0.001)<br>0.5% vs. 1.0% (P=0.20)  |
| OPTIMIZE <sup>2</sup> (2014)    | 3 vs. 12 mo.  | 3,119       | All-cause death, MI, stroke or bleeding at 1 year                                       | Major bleeding at 1 year                                         | Randomization at time of PCI; Single-blind, non-inferiority study                   | 32%  | 6.0% vs. 5.8% (P <sub>NI</sub> =0.002)<br>0.6% vs. 0.9% (P=0.41)  |
| REDUCE <sup>3</sup> (2019)      | 3 vs. 12 mo.  | 1,496       | All-cause death, MI, ST, stroke, TVR or bleeding at 1 year                              | N/A                                                              | Randomization at time of initial hospitalization; Open-label, non-inferiority study | 100% | 8.2% vs. 8.4% (P <sub>NI</sub> <0.001)                            |
| EXCELLENT <sup>4</sup> (2011)   | 6 vs. 12 mo.  | 1,443       | Cardiac death, MI or ischemia driven TVR at 1 year                                      | All-cause death, MI, stroke, ST or TIMI major bleeding at 1 year | Randomization at time of PCI; Open-label, non-inferiority study                     | 51%  | 4.8% vs. 4.3% (P <sub>NI</sub> =0.001)<br>3.3% vs. 3.0% (P=0.64)  |
| ISAR-SAFE <sup>5</sup> (2014)   | 6 vs. 12 mo.  | 4,000       | All-cause death, MI, ST, stroke and TIMI major bleeding at 9 months                     | TIMI major bleeding at 9 months                                  | Randomization at DAPT discontinuation; Double-blind, non-inferiority study          | 40%  | 1.5% vs. 1.6% (P <sub>NI</sub> <0.001)<br>0.2% vs. 0.3% (P=0.74)  |
| I-LOVE-IT 2 <sup>6</sup> (2016) | 6 vs. 12 mo.  | 1,829       | Cardiac death, target vessel MI or clinically indicated TLR at 1 year                   | All-cause death, MI, stroke or BARC type ≥3 bleeding at 1 year   | Randomization at time of PCI; Single-blind, non-inferiority study                   | 85%  | 6.8% vs. 5.9% (P <sub>NI</sub> =0.0065)<br>7.2% vs. 6.4% (P=0.53) |
| IVUS-XPL <sup>7</sup> (2016)    | 6 vs. 12 mo.  | 1,400       | Cardiac death, MI, stroke or TIMI major bleeding at 1 year                              | TIMI major bleeding at 1 year                                    | Randomization at time of PCI; Open-label, superiority study                         | 49%  | 2.2% vs. 2.1% (P=0.85)<br>0.7% vs. 1.0% (P=0.56)                  |
| SMART-DATE <sup>8</sup> (2018)  | 6 vs. 12 mo.  | 2,712       | All-cause death, MI or stroke at 18 months                                              | BARC type 2-5 bleeding at 18 months                              | Randomization at time of PCI; Open-label, non-inferiority study                     | 100% | 4.7% vs. 4.2% (P <sub>NI</sub> =0.03)<br>2.7% vs. 3.9% (P=0.09)   |
| DAPT-STEMI <sup>9</sup> (2018)  | 6 vs. 12 mo.  | 870         | All-cause mortality, revascularization, MI, stroke and TIMI major bleeding at 18 months | All-cause mortality, MI, stroke and TIMI bleeding at 18 months   | Randomization at DAPT discontinuation; Single-blind, non-inferiority study          | 100% | 4.8% vs 6.6% (P <sub>NI</sub> =0.004)<br>3.2% vs. 4.3% (P=0.40)   |
| SECURITY <sup>10</sup> (2014)   | 6 vs. 12 mo.  | 1,399       | Cardiac death, MI, stroke, ST, BARC type 3 or 5 bleeding at 1 year                      | N/A                                                              | Randomization at time of PCI; Open-label, non-inferiority study                     | 38%  | 4.5% vs. 3.7% (P <sub>NI</sub> <0.05)                             |
| PRODIGY <sup>11</sup> (2012)    | 6 vs. 24 mo.  | 1,970       | All-cause death, MI or stroke at 2 years                                                | N/A                                                              | Randomization at time of PCI; Open-label, superiority study                         | 75%  | 10.0% vs. 10.1% (P=0.91)                                          |
| ITALIC <sup>12</sup> (2017)     | 6 vs. 24 mo.  | 1,850       | All-cause death, MI, urgent TVR, stroke or major bleeding at 1 year                     | Major bleeding at 1 year                                         | Randomization at time of PCI; Open-label, non-inferiority study                     | 44%  | 1.6% vs. 1.5% (P <sub>NI</sub> =0.0002)<br>0.4% vs. 0.0% (P=N/A)  |

Abbreviations: ACS=acute coronary syndrome; BARC=Bleeding Academic Research Consortium; DAPT=dual antiplatelet therapy; DES=drug-eluting stent; MI=myocardial infarction; PCI=percutaneous coronary intervention; ST=stent thrombosis; TIMI=Thrombolysis in Myocardial Infarction; TLR=target lesion revascularization; TVR=target vessel revascularization

**Supplementary Table 2.** Randomized controlled trials comparing shortened dual antiplatelet therapy followed by P2Y<sub>12</sub>-inhibitor monotherapy with standard dual antiplatelet therapy

| Study (year)                        | Intervention Strategy                         | Sample Size | Primary Endpoint                                                          | Secondary Endpoint                     | Design and Randomization                                        | ACS  | Primary and Secondary Results (P2Y <sub>12</sub> monotherapy vs. DAPT) |
|-------------------------------------|-----------------------------------------------|-------------|---------------------------------------------------------------------------|----------------------------------------|-----------------------------------------------------------------|------|------------------------------------------------------------------------|
| GLOBAL-LEADERS <sup>13</sup> (2018) | Ticagrelor alone after 1 mo. DAPT             | 15,968      | All-cause death or new Q-wave MI at 2 years                               | BARC type 3 or 5 bleeding at 2 years   | Randomization at time of PCI; Open-label, superiority study     | 47%  | 3.8% vs. 4.4% (P=0.07)<br>2.0% vs. 2.1% (P=0.77)                       |
| STOPDAPT-2 <sup>14</sup> (2019)     | Clopidogrel alone after 1 mo. DAPT            | 3,009       | Cardiac death, MI, stroke, ST, and TIMI major or minor bleeding at 1 year | TIMI major or minor bleeding at 1 year | Randomization at time of PCI; Open-label, non-inferiority study | 38%  | 2.4% vs. 3.7% (P <sub>NI</sub> <0.001)<br>0.4% vs. 1.5% (P=0.004)      |
| SMART-CHOICE <sup>15</sup> (2019)   | P2Y <sub>12</sub> -inhibitor after 3 mo. DAPT | 2,993       | All-cause death, MI or stroke at 1 year                                   | BARC type 2-5 bleeding at 1 year       | Randomization at time of PCI; Open-label, non-inferiority study | 58%  | 2.9% vs. 2.5% (P <sub>NI</sub> =0.007)<br>2.0% vs. 3.4% (P=0.02)       |
| TICO <sup>16</sup> (2020)           | Ticagrelor alone after 3 mo. DAPT             | 3,056       | All-cause death, MI, ST, stroke, TVR or TIMI major bleeding at 1 year     | TIMI major bleeding at 1 year          | Randomization at time of PCI; Open-label, superiority study     | 100% | 3.9% vs. 5.9% (P=0.01)<br>1.7% vs. 3.0% (P=0.02)                       |
| TWILIGHT <sup>17</sup> (2019)       | Ticagrelor alone after 3 mo. DAPT             | 7,119       | BARC type 2, 3, or 5 bleeding at 1 year                                   | All-cause death, MI, stroke at 1 year  | Randomization after 3 months; Double-blind, superiority study   | 65%  | 4.0% vs. 7.1% (P<0.001)<br>3.9% vs. 3.9% (P <sub>NI</sub> <0.001)      |

Abbreviations: ACS=acute coronary syndrome; BARC=Bleeding Academic Research Consortium; DAPT=dual antiplatelet therapy; DES=drug-eluting stent; MI=myocardial infarction; PCI=percutaneous coronary intervention; ST=stent thrombosis; TIMI=Thrombolysis in Myocardial Infarction; TVR=target vessel revascularization

**Supplementary Table 3.** Randomized controlled trials comparing extended with standard or shortened duration of dual antiplatelet therapy

| Study (year)                         | DAPT duration    | Sample Size | Primary Endpoint                                                         | Secondary Endpoint                             | Design and Randomization                                               | ACS  | Primary and Secondary Results (extended vs. standard DAPT)       |
|--------------------------------------|------------------|-------------|--------------------------------------------------------------------------|------------------------------------------------|------------------------------------------------------------------------|------|------------------------------------------------------------------|
| NIPPON <sup>18</sup> (2017)          | 6 vs. 18 mo.     | 3,773       | All-cause death, MI, stroke and major bleeding at 18 months              | N/A                                            | Randomization at time of PCI; Open-label, non-inferiority study        | 45%  | 1.5% vs. 2.1% (P <sub>NI</sub> <0.05)                            |
| PRODIGY <sup>11</sup> (2012)         | 6 vs. 24 mo.     | 1,970       | All-cause death, MI or stroke at 2 years                                 | N/A                                            | Randomization at time of PCI; Open-label, superiority study            | 75%  | 10.1% vs. 10.0% (P=0.91)                                         |
| ITALIC <sup>12</sup> (2017)          | 6 vs. 24 mo.     | 1,850       | All-cause death, MI, urgent TVR, stroke or major bleeding at 1 years     | Major bleeding at 1 year                       | Randomization at time of PCI; Open-label, non-inferiority study        | 44%  | 1.5% vs. 1.6% (P <sub>NI</sub> =0.0002)<br>0.0% vs. 0.4% (P=N/A) |
| ARCTIC <sup>19</sup> (2014)          | 12 vs. 18-24 mo. | 1,259       | All-cause death, MI, ST, stroke or urgent revascularization at 18 months | STEEPLE major bleeding at 18 months            | Randomization at 12 months after PCI; Open-label, superiority study    | 26%  | 4.0% vs. 4.0% (P=0.58)<br><0.5% vs. 1.0% (P=0.07)                |
| DAPT <sup>20</sup> (2014)            | 12 vs. 30 mo.    | 9,961       | All-cause death, MI or stroke at 30 months                               | GUSTO moderate or severe bleeding at 30 months | Randomization at DAPT discontinuation; Double-blind, superiority study | 43%  | 4.3% vs. 5.9% (P<0.001)<br>2.5% vs. 1.6% (P<0.001)               |
| DES LATE <sup>21</sup> (2014)        | 12 vs. 36 mo.    | 5,045       | Cardiac death, myocardial infarction or stroke at 2 years                | TIMI major bleeding at 2 years                 | Randomization at 12 months after PCI; Open-label, superiority study    | 61%  | 2.6% vs. 2.4% (P=0.75)<br>1.4% vs. 1.1% (P=0.20)                 |
| OPTIDUAL <sup>22</sup> (2015)        | 12 vs. 48 mo.    | 1,385       | All-cause death, MI, stroke or major bleeding at 3 years                 | N/A                                            | Randomization at DAPT discontinuation; Open-label, superiority study   | 36%  | 5.8% vs. 7.5% (P=0.17)                                           |
| PEGASUS-TIMI 54 <sup>23</sup> (2016) | 0 vs. 33 mo.     | 21,162      | Cardiac death, MI or stroke at 3 years                                   | TIMI major bleeding at 3 years                 | Randomization 1-3 years after MI; Double-blind, superiority study      | 100% | 7.8% vs. 9.0% (P=0.001)<br>2.6% vs. 1.1% (P<0.001)               |
| THEMIS <sup>24</sup> (2019)          | 0 vs. 54 mo.     | 19,271      | Cardiac death, MI or stroke at 4.5 years                                 | TIMI major bleeding at 4.5 years               | Randomization at outpatient clinic; Double-blind, superiority study    | 0%   | 6.9% vs. 7.6% (P=0.04)<br>0.89% vs. 0.38% (P<0.001)              |

Abbreviations: ACS=acute coronary syndrome; BARC=Bleeding Academic Research Consortium; DAPT=dual antiplatelet therapy; DES=drug eluting stent; GUSTO=Global Utilization Of Streptokinase and Tpa for Occluded arteries; MI=myocardial infarction; PCI=percutaneous coronary intervention; ST=stent thrombosis; TIMI=Thrombolysis in Myocardial Infarction; TVR=target vessel revascularization; STEEPLE=Safety and Efficacy of Enoxaparin in PCI Patients, an International Randomized Evaluation.

**Supplementary Table 4.** Randomized controlled trials comparing factor Xa- or thrombin inhibitor therapy on top of antiplatelet therapy with standard treatment

| Study (year)                              | Intervention Strategy                                  | Sample Size | Primary Endpoint                                              | Secondary Endpoint                                                               | Design and Randomization                                                              | ACS  | Primary and Secondary Results (intervention vs. standard therapy)                              |
|-------------------------------------------|--------------------------------------------------------|-------------|---------------------------------------------------------------|----------------------------------------------------------------------------------|---------------------------------------------------------------------------------------|------|------------------------------------------------------------------------------------------------|
| RE-DEEM <sup>25*</sup> (2009)             | Dabigatran on top of DAPT                              | 1,861       | ISTH major or clinically relevant minor bleeding at 6 months  | Cardiac death, MI or stroke at 6 months                                          | Randomization at time of MI; Double-blind, superiority study                          | 100% | 3.5%, 4.3%, 7.9%, 7.8% vs. 2.2% (P <sub>trend</sub> <0.001)<br>4.6%, 4.9%, 3.0%, 3.5% vs. 3.8% |
| APPRAISE <sup>26†</sup> (2009)            | Apixaban on top of DAPT                                | 1,715       | ISTH major or clinically relevant minor bleeding at 6 months  | Cardiac death, MI, severe recurrent ischemia or stroke at 6 months               | Randomization within 7 days of MI; Double-blind, superiority study                    | 100% | 5.7%, 7.9% vs. 3.0% (P=0.09, P=0.005)<br>7.6%, 6.0% vs. 8.7% (P=0.21, P=0.07)                  |
| ATLAS ACS-TIMI 46 <sup>27‡</sup> (2009)   | Rivaroxaban on top of DAPT                             | 3,491       | All-cause death, MI, stroke or revascularization at 6 months  | TIMI major or minor bleeding or bleeding requiring medical attention at 6 months | Randomization within 7 days after hospital admission; Double-blind, superiority study | 100% | 7.0% vs. 5.9% (P=0.10)<br>8.6% vs. 3.3% (P<0.0001)                                             |
| APPRAISE-2 <sup>28</sup> (2011)           | Apixaban on top of DAPT                                | 7,392       | Cardiac death, MI or stroke at 15 months                      | TIMI major bleeding after 15 months                                              | Randomization within 7 days of ACS; Double-blind, superiority study                   | 100% | 7.5% vs. 7.9% (P=0.51)<br>1.3% vs. 0.5% (P=0.001)                                              |
| ATLAS ACS 2-TIMI 51 <sup>29§</sup> (2012) | Low-dose rivaroxaban on top of DAPT                    | 15,526      | Cardiac death, MI or stroke at 2 years                        | TIMI major bleeding at 2 years                                                   | Randomization within 7 days after hospital admission; Double-blind, superiority study | 100% | 8.9% vs. 10.7% (P=0.008)<br>2.1% vs. 0.6% (P<0.001)                                            |
| COMPASS <sup>30¶</sup> (2017)             | Low-dose rivaroxaban on top of aspirin                 | 27,395      | Cardiac death, MI or stroke after mean follow-up of 23 months | ISTH major bleeding after mean follow-up of 23 months                            | Randomization after run-in phase; Double-blind, superiority study                     | 0%   | 4.1% vs. 5.4% (P<0.001)<br>3.1% vs. 1.9% (P<0.001)                                             |
| GEMINI-ACS-1 <sup>31</sup> (2017)         | Low-dose rivaroxaban plus P2Y <sub>12</sub> -inhibitor | 3,037       | TIMI major bleeding at 1 year                                 | Cardiac death, MI, stroke or ST at 1 year                                        | Randomization within 10 days of ACS; Double-blind, superiority study                  | 100% | 5% vs. 5% (P=0.5840)<br>5% vs. 5% (P=0.7316)                                                   |

Abbreviations: ACS=acute coronary syndrome; BARC=Bleeding Academic Research Consortium; DAPT=dual antiplatelet therapy; DES=drug eluting stent; ISTH=International Society of Thrombosis and Haemostasis; MI=myocardial infarction; PCI=percutaneous coronary intervention; ST=stent thrombosis; TIMI=Thrombolysis in Myocardial Infarction; TVR=target vessel revascularization

\* Phase II trial investigating different doses of dabigatran which showed a dose-dependent increase in bleeding events (P<sub>trend</sub><0.001); Results are for the different doses used (50 mg, 75 mg, 110 mg or 150mg once daily) vs. placebo

† Phase II trial investigating different doses of apixaban; Results are for the different doses used (2.5 mg twice daily and 10 mg once daily) vs. placebo

‡ Phase II trial investigating different doses of rivaroxaban; Results are for the combined rivaroxaban-treated group vs. placebo

§ The ATLAS ACS 2-TIMI 51 trial used both 2.5 mg rivaroxaban twice daily and 5.0 mg rivaroxaban twice daily

¶ The COMPASS trial also looked at low-dose rivaroxaban without aspirin versus aspirin, this analysis is not presented in this table

## **Supplementary Appendix 5**

### **Methodology and results of pooled hazard ratios for bleeding and ischemic events**

#### *Objective*

We intended to show the impact of different risk factors for bleeding and/or ischemic events by pooling hazard ratios from previously published studies in patients with coronary artery disease and using antiplatelet therapy.

#### *Study selection*

We performed a computerized literature search of the PubMed database between January 6<sup>th</sup> and February 15<sup>th</sup> 2020, using the following search terms: “bleeding risk” or “ischemic risk”, “coronary artery disease” and “hazard ratio”. Per risk factor several additional search terms were added (see below). Citations were screened at the title/abstract level and retrieved as full articles (including supplementary material). Additionally, bibliographies of suitable articles were screened using a snowball approach.

Studies were eligible for inclusion if they i) were performed in patients with (a high risk of) coronary artery disease regardless of treatment, ii) reported multivariable adjusted hazard ratios including the corresponding 95%-confidence interval (CI) for bleeding and/or thrombotic risk depending on the risk factor of interest, and iii) were deemed of sufficient methodological quality. Non-English articles, case reports, reviews, and studies reporting duplicate data were excluded.

#### *Statistical analysis*

The statistical analyses were performed with R (version 3.6.1) and RStudio (version 1.2.1335). Pooling was performed at study-level. Due to the expected high heterogeneity between the studies a random-effects model was used. Hazard ratios and 95%-CI were log-transformed to enable the calculation of standard errors. Subsequently, the results were pooled using inverse variance weighting.

#### *Results*

Our literature search produced a vast amount of studies per risk factor. In the section below the search results are shown for each risk factors sorted in three categories: i) risk factors both bleeding and/or ischemic events ii) risk factors for ischemic events alone, and iii) risk factors for bleeding events alone. Results are reported as pooled hazard ratio including corresponding 95%-CI. References to all included studies are also provided.

## Risk factors for bleeding and ischemic events

### 1. Age

Additional search term(s): “age”

Studies screened: 598 (ischemic risk) and 83 (bleeding risk)

|                | Ischemic Risk                      |                                     | Bleeding Risk                     |                         |
|----------------|------------------------------------|-------------------------------------|-----------------------------------|-------------------------|
| Age per 10 yr. | <i>Study</i>                       | <i>HR (95%-CI)</i>                  | <i>Study</i>                      | <i>HR (95%-CI)</i>      |
|                | Zhang et al. (2015) <sup>32</sup>  | 1.55 (1.35-1.78)                    | Ko et al. (2010) <sup>33</sup>    | 1.41 (1.23-1.61)        |
|                | Pepine et al. (2006) <sup>34</sup> | 1.63 (1.56-1.71)                    | Costa et al. (2017) <sup>35</sup> | 1.34 (1.11-1.48)        |
|                |                                    |                                     | Yeh et al. (2016) <sup>36</sup>   | 1.54 (1.34-1.78)        |
|                |                                    | Kikkert et al. (2015) <sup>37</sup> | 1.29 (1.13-1.49)                  |                         |
|                | <b>Pooled hazard ratio</b>         | <b>1.62 (1.55-1.70)</b>             | <b>Pooled hazard ratio</b>        | <b>1.39 (1.30-1.49)</b> |

### 2. Diabetes mellitus

Additional search term(s): “diabetes mellitus”

Studies screened: 268 (ischemic risk) and 31 (bleeding risk)

|                   | Ischemic Risk                         |                            | Bleeding Risk                         |                            |
|-------------------|---------------------------------------|----------------------------|---------------------------------------|----------------------------|
| Diabetes mellitus | <i>Study</i>                          | <i>HR (95%-CI)</i>         | <i>Study</i>                          | <i>HR (95%-CI)</i>         |
|                   | Lemesle et al. (2018) <sup>38</sup>   | 1.41 (1.11-1.78)           | Lemesle et al. (2018) <sup>38</sup>   | 1.75 (1.05-2.91)           |
|                   | Hamilos et al. (2018) <sup>39</sup>   | 1.27 (0.89-1.79)           | Hamilos et al. (2018) <sup>39</sup>   | 1.20 (0.79-1.84)           |
|                   | Lee et al. (2017) <sup>40</sup>       | 1.25 (1.12-1.40)           | Lin et al. (2013) <sup>41</sup>       | 1.21 (0.95-1.55)           |
|                   | Tajik et al. (2017) <sup>42</sup>     | 1.41 (1.29-1.53)           | Palmerini et al. (2013) <sup>43</sup> | 1.31 (1.10-1.55)           |
|                   | Lin et al. (2017) <sup>44</sup>       | 2.15 (1.03-4.49)           |                                       |                            |
|                   | Loutfi et al. (2016) <sup>45</sup>    | 1.82 (1.16-2.84)           |                                       |                            |
|                   | Mathew et al. (2002) <sup>46</sup>    | 1.29 (0.99-1.68)           |                                       |                            |
|                   | Baber et al. (2016) <sup>47</sup>     | 1.69 (1.14-2.52)           |                                       |                            |
|                   | Yeh et al. (2016) <sup>36</sup>       | 1.38 (1.10-1.72)           |                                       |                            |
|                   | Bavry et al. (2013) <sup>48</sup>     | 1.73 (1.57-1.90)           |                                       |                            |
|                   | Bhatt et al. (2010) <sup>49</sup>     | 1.44 (1.36-1.53)           |                                       |                            |
|                   | Vanassche et al. (2019) <sup>50</sup> | 1.46 (1.31-1.63)           |                                       |                            |
|                   | Pepine et al. (2006) <sup>34</sup>    | 1.77 (1.62-1.93)           |                                       |                            |
|                   | Miao et al. (2020) <sup>51</sup>      | 1.25 (1.20-1.30)           |                                       |                            |
|                   | Kikkert et al. (2014) <sup>52</sup>   | 1.69 (1.18-2.41)           |                                       |                            |
|                   |                                       | <b>Pooled hazard ratio</b> | <b>1.46 (1.35-1.57)</b>               | <b>Pooled hazard ratio</b> |

### 3. Chronic kidney disease

Additional search term(s): “chronic kidney disease”, “renal failure”

Studies screened: 198 (ischemic risk) and 50 (bleeding risk)

|                               | <b>Ischemic Risk</b>                 |                         | <b>Bleeding Risk</b>                  |                         |
|-------------------------------|--------------------------------------|-------------------------|---------------------------------------|-------------------------|
|                               | <i>Study</i>                         | <i>HR (95%-CI)</i>      | <i>Study</i>                          | <i>HR (95%-CI)</i>      |
| <b>Chronic kidney disease</b> | Baber et al. (2016) <sup>47</sup>    | 2.12 (1.46-3.05)        | Baber et al. (2016) <sup>47</sup>     | 1.81 (1.16-2.82)        |
|                               | Yeh et al. (2016) <sup>36</sup>      | 1.55 (1.03-2.32)        | Yeh et al. (2016) <sup>36</sup>       | 1.66 (1.04-2.66)        |
|                               | Tomaniak et al. (2020) <sup>53</sup> | 1.55 (1.22-1.96)        | Tomaniak et al. (2020) <sup>53</sup>  | 1.40 (1.22-1.96)        |
|                               | Bernaudo et al. (2013) <sup>54</sup> | 1.77 (1.15-2.73)        | Saltzman et al. (2011) <sup>55</sup>  | 1.43 (1.26-1.62)        |
|                               | Dan et al. (2012) <sup>56</sup>      | 2.39 (2.35-4.26)        | Ko et al. (2010) <sup>33</sup>        | 1.93 (1.37-2.74)        |
|                               | Saltzman et al. (2011) <sup>55</sup> | 1.38 (1.20-1.59)        | Ninomiva et al. (2005) <sup>57</sup>  | 1.09 (0.29-4.13)        |
|                               | Buckley et al. (2009) <sup>58</sup>  | 1.32 (0.18-9.59)        | Manzano et al. (2009) <sup>59</sup>   | 2.59 (1.00-6.95)        |
|                               | Chonchol et al. (2007) <sup>60</sup> | 1.46 (1.01-2.11)        | Lin et al. (2013) <sup>41</sup>       | 1.58 (1.17-2.13)        |
|                               | Ninomiya et al. (2005) <sup>57</sup> | 2.26 (1.06-4.79)        | Honda et al. (2017) <sup>61</sup>     | 1.56 (1.10-2.42)        |
|                               | Bavry et al. (2013) <sup>48</sup>    | 1.62 (1.30-2.01)        | Manzano et al. (2008) <sup>62</sup>   | 3.10 (0.60-16.0)        |
|                               |                                      |                         | Palmerini et al. (2013) <sup>43</sup> | 1.24 (1.05-1.47)        |
|                               | <b>Pooled hazard ratio</b>           | <b>1.68 (1.46-1.92)</b> | <b>Pooled hazard ratio</b>            | <b>1.46 (1.32-1.63)</b> |



## Risk factors for ischemic events

### 1. ACS at presentation

Additional search term(s): “acute coronary syndrome”, “ACS”

Studies screened: 43

|                            | Ischemic Risk                     | Bleeding Risk           |
|----------------------------|-----------------------------------|-------------------------|
| <b>ACS at presentation</b> | <i>Study</i>                      | <i>HR (95%-CI)</i>      |
|                            | Baber et al. (2016) <sup>47</sup> | 2.09 (1.24-3.53)        |
|                            | Yeh et al. (2016) <sup>36</sup>   | 1.79 (1.43-2.23)        |
|                            | <b>Pooled hazard ratio</b>        | <b>1.84 (1.49-2.25)</b> |

### 2. Prior myocardial infarction

Additional search term(s): “prior myocardial infarction”, “history of myocardial infarction”

Studies screened: 299

|                                    | Ischemic Risk                       | Bleeding Risk           |
|------------------------------------|-------------------------------------|-------------------------|
| <b>Prior myocardial infarction</b> | <i>Study</i>                        | <i>HR (95%-CI)</i>      |
|                                    | Lin et al. (2017) <sup>44</sup>     | 3.17 (1.80-5.57)        |
|                                    | Yeh et al. (2016) <sup>36</sup>     | 1.79 (1.43-2.23)        |
|                                    | Bavry et al. (2013) <sup>48</sup>   | 1.48 (1.35-1.63)        |
|                                    | Bhatt et al. (2010) <sup>49</sup>   | 1.71 (1.57-1.85)        |
|                                    | Pepine et al. (2006) <sup>34</sup>  | 1.34 (1.23-1.46)        |
|                                    | Kikkert et al. (2014) <sup>52</sup> | 1.47 (1.03-2.10)        |
|                                    | <b>Pooled hazard ratio</b>          | <b>1.60 (1.39-1.82)</b> |

### 3. Multivessel disease

Additional search term(s): “extensive coronary artery disease”, “multivessel coronary artery disease”

Studies screened: 139

|                      | Ischemic Risk                       | Bleeding Risk           |
|----------------------|-------------------------------------|-------------------------|
| <b>Extensive CAD</b> | <i>Study</i>                        | <i>HR (95%-CI)</i>      |
|                      | Lee et al. (2017) <sup>40</sup>     | 1.14 (1.08-1.21)        |
|                      | Lemesle et al. (2017) <sup>63</sup> | 1.53 (1.08-2.15)        |
|                      | Arnold et al. (2015) <sup>64</sup>  | 2.89 (1.90-4.39)        |
|                      | Sorajja et al. (2007) <sup>65</sup> | 1.80 (1.27-2.54)        |
|                      | Kikkert et al. (2014) <sup>52</sup> | 1.52 (1.12-2.06)        |
|                      | <b>Pooled hazard ratio</b>          | <b>1.63 (1.21-2.18)</b> |

### 4. Smoking

Additional search term(s): “smoking”

Studies screened: 137

|                            | Ischemic Risk                         | Bleeding Risk      |
|----------------------------|---------------------------------------|--------------------|
| <b>Smoking</b>             | <i>Study</i>                          | <i>HR (95%-CI)</i> |
|                            | Lin et al. (2017) <sup>44</sup>       | 1.48 (1.16-1.89)   |
|                            | Buckley et al. (2009) <sup>58</sup>   | 1.94 (1.31-2.89)   |
|                            | Baber et al. (2016) <sup>47</sup>     | 1.69 (1.14-2.52)   |
|                            | Yeh et al. (2016) <sup>36</sup>       | 1.40 (1.11-1.76)   |
|                            | Lemesle et al. (2017) <sup>63</sup>   | 1.87 (1.27-2.77)   |
|                            | Bavry et al. (2013) <sup>48</sup>     | 1.42 (1.29-1.57)   |
|                            | Bhatt et al. (2010) <sup>49</sup>     | 1.30 (1.20-1.41)   |
|                            | Vanassche et al. (2019) <sup>50</sup> | 1.15 (1.01-1.31)   |
|                            | Khan et al. (2017) <sup>66</sup>      | 1.49 (0.97-2.29)   |
|                            | Zhang et al. (2015) <sup>32</sup>     | 1.80 (1.34-2.54)   |
|                            | Satoh et al. (2006) <sup>67</sup>     | 2.47 (0.86-7.10)   |
|                            | Pepine et al. (2006) <sup>34</sup>    | 1.41 (1.29-1.54)   |
|                            | Miao et al. (2020) <sup>51</sup>      | 1.56 (1.47-1.65)   |
| <b>Pooled hazard ratio</b> | <b>1.45 (1.34-1.57)</b>               |                    |

5. *Peripheral artery disease*

Additional search term(s): “peripheral artery disease”

Studies screened: 172

|                                     | Ischemic Risk                        | Bleeding Risk           |
|-------------------------------------|--------------------------------------|-------------------------|
| <b>Peripheral Artery Disease</b>    | <i>Study</i>                         | <i>HR (95%-CI)</i>      |
|                                     | Buckley et al. (2009) <sup>58</sup>  | 1.01 (0.50-2.01)        |
|                                     | Yeh et al. (2016) <sup>36</sup>      | 1.49 (1.05-2.13)        |
|                                     | Ostman et al. (2017) <sup>68</sup>   | 2.10 (1.34-3.27)        |
|                                     | Bavry et al. (2013) <sup>48</sup>    | 1.20 (1.06-1.36)        |
|                                     | Zhang et al. (2015) <sup>32</sup>    | 1.85 (1.34-2.54)        |
|                                     | Pepine et al. (2006) <sup>34</sup>   | 1.27 (1.14-1.42)        |
|                                     | Miao et al. (2020) <sup>51</sup>     | 1.28 (1.22-1.35)        |
|                                     | Inohara et al. (2018) <sup>69</sup>  | 1.63 (1.48-1.78)        |
|                                     | Franzone et al. (2016) <sup>70</sup> | 1.70 (1.17-2.48)        |
|                                     | Inglis et al. (2013) <sup>71</sup>   | 1.26 (1.09-1.44)        |
| Kikkert et al. (2014) <sup>52</sup> | 1.89 (1.22-2.92)                     |                         |
|                                     | <b>Pooled hazard ratio</b>           | <b>1.42 (1.28-1.58)</b> |

1. *Complex PCI*

Additional search term(s): “complex PCI”, “complex lesions”

Studies screened: 83

|                            | Ischemic Risk                        | Bleeding Risk           |
|----------------------------|--------------------------------------|-------------------------|
| <b>ACS at presentation</b> | <i>Study</i>                         | <i>HR (95%-CI)</i>      |
|                            | Giustino et al. (2016) <sup>72</sup> | 1.98 (1.50-2.60)        |
|                            | Yeh et al. (2017) <sup>73</sup>      | 2.05 (1.60-2.61)        |
|                            | Wang et al. (2020) <sup>74</sup>     | 1.63 (1.38-1.92)        |
|                            | <b>Pooled hazard ratio</b>           | <b>1.82 (1.55-2.14)</b> |

## Risk factors for bleeding events

### 1. History of bleeding

Additional search term(s): “history of bleeding”, “previous bleeding”

Studies screened: 55

|                     | Ischemic Risk              | Bleeding Risk                       |                    |
|---------------------|----------------------------|-------------------------------------|--------------------|
| History of bleeding | X                          | <i>Study</i>                        | <i>HR (95%-CI)</i> |
|                     |                            | Ko et al. (2010) <sup>33</sup>      | 2.42 (1.70-3.46)   |
|                     |                            | Costa et al. (2017) <sup>35</sup>   | 4.14 (1.22-14.0)   |
|                     |                            | Bonaca et al. (2018) <sup>75</sup>  | 3.51 (2.08-5.90)   |
|                     |                            | Lin et al. (2013) <sup>41</sup>     | 3.70 (2.82-4.85)   |
|                     |                            | Honda et al. (2017) <sup>61</sup>   | 3.49 (2.03-5.79)   |
|                     |                            | Manzano et al. (2008) <sup>62</sup> | 1.10 (0.20-4.40)   |
|                     |                            | Kikkert et al. (2015) <sup>37</sup> | 2.07 (1.14-3.73)   |
|                     | <b>Pooled hazard ratio</b> | <b>3.00 (2.41-3.78)</b>             |                    |

### 2. Triple therapy

Additional search term(s): “triple therapy”, “oral anticoagulants”

Studies screened: 43

|                | Ischemic Risk              | Bleeding Risk                       |                    |
|----------------|----------------------------|-------------------------------------|--------------------|
| Triple Therapy | X                          | <i>Study</i>                        | <i>HR (95%-CI)</i> |
|                |                            | Ko et al. (2010) <sup>33</sup>      | 3.12 (2.50-3.90)   |
|                |                            | Manzano et al. (2009) <sup>59</sup> | 3.29 (1.23-8.84)   |
|                |                            | Baber et al. (2016) <sup>47</sup>   | 1.93 (1.08-3.43)   |
|                |                            | Inohara et al. (2019) <sup>76</sup> | 2.27 (1.38-3.73)   |
|                |                            | Honda et al. (2017) <sup>61</sup>   | 2.94 (1.83-4.61)   |
|                |                            | Choi et al. (2017) <sup>77</sup>    | 4.48 (1.81-11.1)   |
|                |                            | Lopes et al. (2016) <sup>78</sup>   | 1.55 (0.44-5.47)   |
|                |                            | Mennuni et al. (2015) <sup>79</sup> | 1.79 (1.11-2.89)   |
|                |                            | Manzano et al. (2008) <sup>62</sup> | 7.10 (1.50-32.4)   |
|                | <b>Pooled hazard ratio</b> | <b>2.64 (2.16-3.25)</b>             |                    |

### 3. Anemia

Additional search term(s): “anemia”, “low hemoglobin”

Studies screened: 15

|        |   | Ischemic Risk              | Bleeding Risk                        |                    |
|--------|---|----------------------------|--------------------------------------|--------------------|
| Anemia | X |                            | <i>Study</i>                         | <i>HR (95%-CI)</i> |
|        |   |                            | Kalra et al. (2017) <sup>80</sup>    | 2.06 (1.23-3.44)   |
|        |   |                            | Manzano et al. (2009) <sup>59</sup>  | 2.36 (1.00-5.54)   |
|        |   |                            | Baber et al. (2016) <sup>47</sup>    | 2.72 (1.83-4.04)   |
|        |   |                            | Bonaca et al. (2018) <sup>75</sup>   | 1.56 (1.22-1.98)   |
|        |   |                            | Honda et al. (2017) <sup>61</sup>    | 1.75 (1.10-2.73)   |
|        |   |                            | Manzano et al. (2008) <sup>62</sup>  | 3.80 (1.20-12.5)   |
|        |   |                            | Wester et al. (2019) <sup>81</sup>   | 1.30 (1.00-1.60)   |
|        |   |                            | Kikkert et al. (2015) <sup>37</sup>  | 1.87 (1.26-2.79)   |
|        |   |                            | Faggioni et al. (2019) <sup>82</sup> | 2.32 (1.67-3.20)   |
|        |   | <b>Pooled hazard ratio</b> | <b>1.90 (1.55-2.29)</b>              |                    |

### 4. Malignancy

Additional search term(s): “malignancy”, “cancer”

Studies screened: 10

|            |   | Ischemic Risk | Bleeding Risk                         |                    |
|------------|---|---------------|---------------------------------------|--------------------|
| Malignancy | X |               | <i>Study</i>                          | <i>HR (95%-CI)</i> |
|            |   |               | Ko et al. (2010) <sup>33</sup>        | 1.80 (1.09-2.96)   |
|            |   |               | Nakatsuma et al. (2018) <sup>83</sup> | 1.28 (1.08-1.51)   |
|            |   |               |                                       |                    |

5. *Liver cirrhosis*

Additional search term(s): “liver cirrhosis”, “liver failure”

Studies screened: 49

|                        |  | Ischemic Risk | Bleeding Risk                                                                                                                           |                         |
|------------------------|--|---------------|-----------------------------------------------------------------------------------------------------------------------------------------|-------------------------|
| <b>Liver cirrhosis</b> |  |               | <i>Study</i> <i>HR (95%-CI)</i><br>Lin et al. (2013) <sup>41</sup> 1.74 (0.96-3.17)<br>Kuo et al. (2017) <sup>84</sup> 1.37 (1.09-1.71) |                         |
|                        |  |               | <b>Pooled hazard ratio</b>                                                                                                              | <b>1.40 (1.14-1.75)</b> |

6. *Leukocytosis*

Additional search term(s): “leukocytes”, “white blood cells”, “leukocytosis”

Studies screened: 29

|                     |  | Ischemic Risk | Bleeding Risk                                                                                                                                                                                             |                         |
|---------------------|--|---------------|-----------------------------------------------------------------------------------------------------------------------------------------------------------------------------------------------------------|-------------------------|
| <b>Leukocytosis</b> |  |               | <i>Study</i> <i>HR (95%-CI)</i><br>Costa et al. (2017) <sup>35</sup> 1.06 (0.99-1.13)<br>Palmerini et al. (2011) <sup>85</sup> 1.08 (1.04-1.12)<br>Palmerini et al. (2013) <sup>43</sup> 1.05 (1.03-1.07) |                         |
|                     |  |               | <b>Pooled hazard ratio</b>                                                                                                                                                                                | <b>1.06 (1.04-1.08)</b> |

7. *Thrombocytopenia*

Additional search term(s): “thrombocytopenia”

Studies screened: 62

|                         |                                                                                   | Ischemic Risk              | Bleeding Risk                                        |
|-------------------------|-----------------------------------------------------------------------------------|----------------------------|------------------------------------------------------|
| <b>Thrombocytopenia</b> | 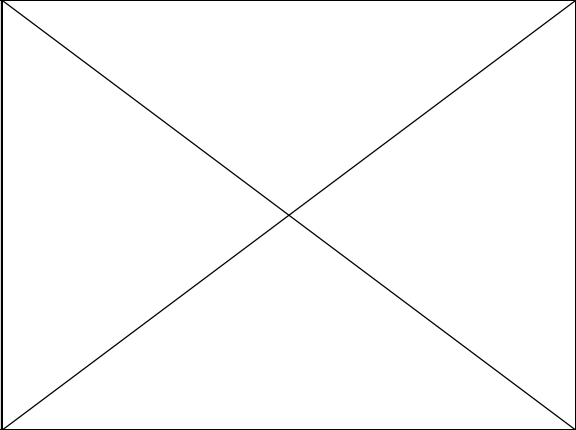 |                            | <i>Study</i> <i>HR (95%-CI)</i>                      |
|                         |                                                                                   |                            | Kikkert et al. (2015) <sup>37</sup> 2.07 (1.10-3.91) |
|                         |                                                                                   |                            | Morici et al. (2019) <sup>86</sup> 1.34 (0.64-2.81)  |
|                         |                                                                                   |                            | Ito et al. (2018) <sup>87</sup> 2.35 (1.80-3.08)     |
|                         | Hakim et al. (2011) <sup>88</sup> 1.65 (1.03-2.67)                                |                            |                                                      |
|                         |                                                                                   | <b>Pooled hazard ratio</b> | <b>1.99 (1.55-2.59)</b>                              |

**Supplementary Table 6.** Derivation cohorts of risk scores developed to guide decision-making surrounding dual antiplatelet therapy duration after percutaneous coronary intervention

|                           | PRECISE-DAPT score <sup>35</sup>                                                               | DAPT score <sup>36</sup>     |
|---------------------------|------------------------------------------------------------------------------------------------|------------------------------|
| Size derivation cohort    | 14,963                                                                                         | 11,648                       |
| Age (years $\pm$ SD)      | 65.0*                                                                                          | 61.3 $\pm$ 10.3              |
| Sex (male %)              | 10,549 (70.5)                                                                                  | 8,723 (74.9)                 |
| Active smoking (%)        | 3,757 (28.0)                                                                                   | 3,142 (27.0)                 |
| Hypertension (%)          | 10,739 (71.9)                                                                                  | 8,522 (73.2)                 |
| Hypercholesterolemia (%)  | 9,080 (61.3)                                                                                   | N/A                          |
| Diabetes Mellitus (%)     | 4,168 (27.9)                                                                                   | 3,391 (30.4)                 |
| Prior MI (%)              | 2,946 (19.8)                                                                                   | 2,456 (21.1)                 |
| Prior PCI (%)             | 2,392 (16.0)                                                                                   | 3,368 (30.1)                 |
| Prior CABG (%)            | 893 (6.0)                                                                                      | 1,249 (10.7)                 |
| Clinical presentation (%) |                                                                                                |                              |
| CCS                       | 6,299 (42.1)                                                                                   | 4,149 (35.6)                 |
| ACS, troponin negative    | 3,215 (21.5)                                                                                   | 1,821 (15.6)                 |
| ACS, troponin positive    | 4,669 (31.2)                                                                                   | 3,576 (30.7)                 |
| Unknown                   | 780 (5.2)                                                                                      | 2,102 (18.0)                 |
| Follow-up                 | 7 days until 12 months                                                                         | 12 until 30 months           |
| Derivation cohort         | BIOSCIENCE<br>COMFORTABLE AMI<br>EXCELLENT<br>OPTIMIZE<br>PRODIGY<br>RESET<br>SECURITY<br>ZEUS | DAPT                         |
| Validation cohort         | PLATO<br>BernPCI registry                                                                      | DAPT <sup>†</sup><br>PROTECT |

Abbreviations: ACS=acute coronary syndrome; CABG=coronary bypass grafting; CCS=chronic coronary syndrome; MI=myocardial infarction; PCI=percutaneous coronary intervention; SD=standard deviation

Results are reported as mean  $\pm$ SD or number of patients (%) unless mentioned otherwise

\* Median value

† Validation of the DAPT score occurred through bootstrap resampling of the derivation cohort



**Supplementary Table 7.** Validation studies of the PREdicting bleeding Complications In patients undergoing Stent implantation and subSEquent Dual Anti Platelet Therapy (PRECISE-DAPT) score showing cohort characteristics, score discrimination (C-statistic) and calibration

| Study (cohort)                                                  | Population (n)                              | Cohort type  | ACS  | Period    | Bleeding endpoint                                        | Bleeding definition                                                          | Event rate                   | C-statistic (95% CI)                                                         | Calibration    |
|-----------------------------------------------------------------|---------------------------------------------|--------------|------|-----------|----------------------------------------------------------|------------------------------------------------------------------------------|------------------------------|------------------------------------------------------------------------------|----------------|
| Costa et al. 2017 <sup>35</sup><br>( <i>derivation cohort</i> ) | PCI, DAPT<br>(14,963)                       | RCT          | 56%  | 2007-2014 | Out-of-hospital bleeding at 1 year                       | TIMI major or minor<br>TIMI major<br>BARC type 2, 3 or 5<br>BARC type 3 or 5 | 1.5%<br>0.8%<br>2.4%<br>1.6% | 0.73 (0.61-0.85)<br>0.71 (0.57-0.85)<br>0.68 (0.63-0.72)<br>0.68 (0.63-0.73) | Adequate       |
| Costa et al. 2017 <sup>35</sup><br>( <i>PLATO</i> )             | ACS<br>(8,595)                              | RCT          | 100% | 2006-2008 | Out-of-hospital bleeding at 1 year                       | TIMI major or minor<br>TIMI major                                            | 1.7%<br>1.1%                 | 0.70 (0.65-0.74)<br>0.68 (0.63-0.74)                                         | Underestimated |
| Costa et al. 2017 <sup>35</sup><br>( <i>BernPCI</i> )           | PCI<br>(6,172)                              | Registry     | 55%  | 2009-2014 | Out-of-hospital bleeding at 1 year                       | TIMI major or minor<br>TIMI major                                            | 1.5%<br>1.0%                 | 0.66 (0.61-0.71)<br>0.65 (0.58-0.71)                                         | Adequate       |
| Abu-Assi et al. 2018 <sup>89</sup><br>( <i>Cardio-CHUVI</i> )   | ACS, PCI, DAPT<br>(2,064)                   | Registry     | 100% | 2012-2015 | Out-of-hospital bleeding at 1 year                       | BARC type 2, 3 or 5<br>BARC type 3 or 5                                      | 7.1%<br>2.8%                 | 0.61 (0.56-0.66)<br>0.73 (0.67-0.79)                                         | Adequate       |
| Choi et al. 2018 <sup>90</sup><br>( <i>Korean cohort</i> )      | PCI, DAPT<br>(904)                          | Registry     | 34%  | 2008-2016 | Bleeding at 1 year                                       | TIMI major or minor<br>BARC type 3-5                                         | 13.2%<br>17.0%               | 0.75 (0.72-0.78)<br>0.81 (0.78-0.84)                                         | Adequate       |
| Morici et al. 2019 <sup>86</sup><br>( <i>Italian cohort</i> )   | ACS<br>(1,000)                              | Cohort study | 100% | 2014-2017 | Bleeding during follow-up<br>(median follow-up 496 days) | BARC type 2-5                                                                | 7.2%                         | 0.83 (0.76-0.90)                                                             | N/A            |
| Pavasini et al. 2019 <sup>91</sup><br>( <i>FRASER</i> )         | ACS, DAPT, ≥70yrs<br>(402)                  | Cohort study | 100% | 2014-2016 | Bleeding at 1 year                                       | BARC type 3 or 5                                                             | 4.0%                         | 0.79 (0.66-0.91)                                                             | N/A            |
| Bianco et al. 2020 <sup>92</sup><br>( <i>RENAMI</i> )           | ACS, PCI, DAPT<br>(4,434)                   | Registry     | 100% | 2012-2016 | Bleeding on DAPT<br>(median follow-up 14 months)         | BARC type 3 or 5                                                             | 1.9%                         | 0.65 (0.59-0.71)                                                             | Adequate       |
| Ueki et al. 2020 <sup>93</sup><br>( <i>BernPCI</i> )            | PCI<br>(12,121)                             | Registry     | 56%  | 2009-2016 | Bleeding at 1 year                                       | BARC type 3 or 5                                                             | 3.7%                         | 0.67 (0.65-0.70)                                                             | N/A            |
| Marti et al. 2020 <sup>94</sup><br>( <i>Spanish cohort</i> )    | PCI, DAPT, ≥75yrs<br>(448)                  | Cohort study | 53%  | 2012-2017 | Bleeding at 1 year<br>(non-access related)               | BARC type 3 or 5                                                             | 7.3%                         | 0.67 (0.62-0.71)                                                             | Adequate       |
| Choi et al. 2020 <sup>95</sup><br>( <i>SMART-DATE</i> )         | ACS, PCI, DAPT<br>(2,712)                   | RCT          | 100% | 2012-2015 | Out-of-hospital bleeding at 18<br>months                 | BARC type 3 or 5                                                             | 0.5%                         | 0.75 (0.66-0.85)                                                             | N/A            |
| Gragnano et al. 2020 <sup>96</sup><br>( <i>GLOBAL-LEADERS</i> ) | PCI, DAPT<br>(14,928)                       | RCT          | 50%  | 2013-2015 | Bleeding at 1 year<br>Bleeding at 2 years                | BARC type 3 or 5<br>BARC type 3 or 5                                         | 1.6%<br>2.2%                 | 0.65 (0.61-0.68)<br>0.65 (0.62-0.68)                                         | Adequate       |
| Rozemeijer et al. 2020 <sup>97</sup><br>( <i>ReCre8</i> )       | PCI, DAPT<br>(1,491)                        | RCT          | 58%  | 2014-2017 | Out-of-hospital bleeding at 1 year                       | BARC type 2, 3 or 5                                                          | 2.3%                         | 0.59 (0.48-0.69)                                                             | Adequate       |
| Marquis et al. 2020 <sup>98</sup><br>( <i>TRILOGY-ACS</i> )     | ACS, DAPT,<br>medical management<br>(9,326) | RCT          | 100% | 2008-2012 | Bleeding at 1 year<br>Bleeding at 2 years                | TIMI major or minor<br>TIMI major or minor                                   | 1.3%<br>1.7%                 | 0.62 (0.58-0.67)<br>0.62 (0.58-0.66)                                         | Adequate       |

Abbreviations: ACS=acute coronary syndrome; BARC=Bleeding Academic Research Consortium; DAPT=dual antiplatelet therapy; PCI=percutaneous coronary intervention; RCT=randomized controlled trial; TIMI=Thrombolysis in Myocardial Infarction.

**Supplementary Table 8.** Validation studies of the Dual Antiplatelet Therapy (DAPT) score as a decision tool, with cohort characteristics and absolute risk differences of ischemic and bleeding events of prolonged DAPT compared to standard DAPT, stratified to DAPT score outcome

| Study (cohort)                                                                  | Population (n)  | DAPT duration         | Cohort type      | ACS | Period    | DAPT score | Absolute risk differences of prolonged versus standard DAPT (95% CI)     |                      |             |                                                      |                      |             |
|---------------------------------------------------------------------------------|-----------------|-----------------------|------------------|-----|-----------|------------|--------------------------------------------------------------------------|----------------------|-------------|------------------------------------------------------|----------------------|-------------|
|                                                                                 |                 |                       |                  |     |           |            | Ischemic Endpoint                                                        | Event rate           | P-value     | Bleeding endpoint                                    | Event rate           | P-value     |
| Yeh et al. 2016 <sup>36</sup><br>(DAPT)                                         | PCI<br>(11,648) | 12 vs. 30<br>months   | RCT              | 74% | 2009-2014 | ≥2         | Definite or probable<br>ST or MI at 30 months                            | -3.0% (-4.1%, -2.0%) | <0.001      | GUSTO moderate or<br>severe bleeding at 30<br>months | +0.4% (-0.3%, +1.0%) | 0.26        |
|                                                                                 |                 |                       |                  |     |           | <2         |                                                                          | -0.7% (-1.4%, +0.1%) | 0.07        |                                                      | +1.6% (+0.8%, +2.3%) | <0.001      |
| Harada et al. 2017 <sup>99</sup><br>(ISAR-SAFE)                                 | PCI<br>(3,976)  | 6 vs. 12<br>months    | RCT              | 40% | 2009-2014 | ≥2         | Death, MI, ST or<br>stroke at 15 months                                  | -0.1% (N/A)          | 0.96        | TIMI major bleeding<br>at 15 months                  | 0.0% (N/A)           | 0.44        |
|                                                                                 |                 |                       |                  |     |           | <2         |                                                                          | +0.4% (N/A)          | 0.43        |                                                      | 0.0% (N/A)           | 0.65        |
| Piccolo et al. 2017 <sup>100</sup><br>(PRODIGY)                                 | PCI<br>(1,970)  | 6 vs. 24<br>months    | RCT              | 74% | 2006-2011 | ≥2         | Definite or probable<br>ST or MI at 24 months                            | -0.6% (-2.8%, +1.6%) | N/A         | GUSTO moderate or<br>severe bleeding at 24<br>months | +0.2% (-1.0%, +1.4%) | N/A         |
|                                                                                 |                 |                       |                  |     |           | <2         |                                                                          | +1.2% (-0.8%, +3.1%) | N/A         |                                                      | +2.6% (-0.8%, +4.4%) | N/A         |
| Yoshikawa et al. 2018 <sup>101</sup><br>(CREDO-Kyoto,<br>RESET&NEXT)            | PCI<br>(1,590)  | <13 vs. ≥13<br>months | RCT,<br>registry | 22% | 2005-2011 | ≥2         | Definite or probable<br>ST or MI at 36 months                            | -1.0% (N/A)          | 0.10        | GUSTO moderate or<br>severe bleeding at 36<br>months | -0.3% (N/A)          | 0.76        |
|                                                                                 |                 |                       |                  |     |           | <2         |                                                                          | -0.2% (N/A)          | 0.51        |                                                      | +0.9% (N/A)          | 0.08        |
| Witberg et al. 2020 <sup>102</sup><br>(Israeli cohort)                          | PCI<br>(4,471)  | 12 vs. >12<br>months  | Registry         | 58% | 2008-2018 | ≥2         | MI at 36 months                                                          | -1.6% (N/A)          | 0.11        | Actionable bleeding at<br>36 months                  | +0.2% (N/A)          | 0.80        |
|                                                                                 |                 |                       |                  |     |           | <2         |                                                                          |                      | -0.4% (N/A) |                                                      | 0.66                 | +0.8% (N/A) |
| Jang et al. 2020 <sup>103</sup><br>(EXCELLENT,<br>RESET, IVUS-XPL,<br>OPTIMA-C) | PCI<br>(5,131)  | ≤6 vs. ≥12<br>months  | RCT              | 57% | 2008-2014 | ≥2         | Cardiac death, MI, ST,<br>stroke or<br>revascularization at 12<br>months | -2.9% (N/A)          | 0.02        | TIMI major or minor<br>bleeding at 12 months         | +0.3% (N/A)          | 0.47        |
|                                                                                 |                 |                       |                  |     |           | <2         |                                                                          | +0.1% (N/A)          | 0.91        |                                                      | +0.4% (N/A)          | 0.09        |
| Gao et al. 2020 <sup>104</sup><br>(Chinese cohort)                              | PCI<br>(10,724) | <13 vs. ≥13<br>months | Registry         | 62% | 2013      | ≥2         | Definite or probable<br>ST or MI at 24 months                            | -0.2% (N/A)          | 0.51        | GUSTO moderate or<br>severe bleeding at 24<br>months | -0.1% (N/A)          | 0.65        |
|                                                                                 |                 |                       |                  |     |           | <2         |                                                                          | -0.1% (N/A)          | 0.66        |                                                      | -0.1% (N/A)          | 0.32        |

Abbreviations: ACS=acute coronary syndrome; DAPT=dual antiplatelet therapy; GUSTO=Global Utilization Of Streptokinase and Tpa for Occluded arteries; MI=myocardial infarction; PCI=percutaneous coronary intervention; RCT=randomized controlled trial; ST=stent thrombosis; TIMI=Thrombolysis in Myocardial Infarction.

**Supplementary Table 9.** Validation studies of the Dual Antiplatelet Therapy (DAPT) score, showing cohort characteristics, score discrimination (C-statistic) and calibration

| Study (cohort)                                                | Population (n)                                          | Cohort type | ACS  | Period    | Endpoint definition                                | Event rate | C-statistic (95% CI) | Calibration   |
|---------------------------------------------------------------|---------------------------------------------------------|-------------|------|-----------|----------------------------------------------------|------------|----------------------|---------------|
| Harada et al. 2017 <sup>100</sup><br>(ISAR-SAFE)              | PCI, event free at 6 months<br>(3,976)                  | RCT         | 40%  | 2009-2014 | Death, MI, definite ST or stroke at 15 months      | 1.4%       | 0.57 (0.52-0.64)     | N/A           |
|                                                               |                                                         |             |      |           | TIMI major or minor bleeding at 15 months          | 0.5%       | 0.63 (0.53-0.72)     | N/A           |
| Brener et al. 2018 <sup>105</sup><br>(ADAPT-DES)              | PCI, event free at 12 months<br>(5,397)                 | Registry    | 55%  | 2008-2010 | Definite ST or MI at 24 months                     | 1.3%       | 0.71 (N/A)           | Adequate      |
|                                                               |                                                         |             |      |           | Bleeding requiring medical attention at 24 months  | 2.2%       | 0.62 (N/A)           | Adequate      |
| Song et al. 2018 <sup>106</sup><br>(Chinese cohort)           | PCI, ACS, event free on<br>DAPT at 12 months<br>(6,088) | Registry    | 100% | 2013      | Probable or definite ST or MI at 24 months         | 2.6%       | 0.53 (N/A)           | N/A           |
|                                                               |                                                         |             |      |           | Major bleeding at 24 months                        | 0.5%       | 0.71 (N/A)           | N/A           |
| Ueda et al. 2018 <sup>107</sup><br>(SWEDEHEART)               | PCI, event free at 12 months<br>(41,101)                | Registry    | 65%  | 2006-2013 | Definite ST or MI at 30 months                     | 3.1%       | 0.58 (0.56-0.60)     | Overestimated |
|                                                               |                                                         |             |      |           | Fatal or nonfatal major bleeding at 30 months      | 0.7%       | 0.49 (0.45-0.53)     | Overestimated |
| Veron-Esquivel et al. 2019 <sup>108</sup><br>(Mexican cohort) | PCI, MI<br>(230)                                        | Registry    | 100% | 2010-2016 | Definite ST, MI, TVR or ISR at end of follow-up    | 17.0%      | 0.59 (0.50-0.69)     | Adequate      |
|                                                               |                                                         |             |      |           | GUSTO moderate or severe bleed at end of follow-up | 4.8%       | 0.79 (0.66-0.93)     | Adequate      |
| Witberg et al. 2020 <sup>102</sup><br>(Israeli cohort)        | PCI, event free at 12 months<br>(4,471)                 | Registry    | 58%  | 2008-2016 | MI at 36 months                                    | 7.2%       | 0.50 (0.47-0.53)     | N/A           |
|                                                               |                                                         |             |      |           | Actionable bleeding at 36 months                   | 2.3%       | 0.46 (0.41-0.52)     | N/A           |

Abbreviations: ACS=acute coronary syndrome; DAPT=dual antiplatelet therapy; GUSTO=Global Utilization Of Streptokinase and Tpa for Occluded arteries; ISR=in-stent restenosis; MI=myocardial infarction; PCI=percutaneous coronary intervention; RCT=randomized controlled trial; ST=stent thrombosis; TIMI=Thrombolysis in Myocardial Infarction; TVR=target vessel revascularization.

**Supplementary Table 10.** Randomized controlled trials comparing platelet function-guided dual antiplatelet therapy with standard antiplatelet therapy

| Study (year)                         | Intervention Strategy                                                                | Sample Size | Primary Endpoint                                                                            | Secondary Endpoint                            | Design and Randomization                                        | ACS  | Primary and Secondary Results (guided vs. non-guided therapy)     |
|--------------------------------------|--------------------------------------------------------------------------------------|-------------|---------------------------------------------------------------------------------------------|-----------------------------------------------|-----------------------------------------------------------------|------|-------------------------------------------------------------------|
| Bonello et al. <sup>109</sup> (2009) | Escalation of clopidogrel LD if HPR after initial dose (max. 3 LDs in guided group)  | 429         | Definite ST at 1 month                                                                      | TIMI major or minor bleeding at 1 month       | Randomization at time of PCI; Single-blind, superiority study   | 52%  | 0.5% vs. 4.7% (P=0.01)<br>3.7% vs. 2.8% (P=0.80)                  |
| 3T/2R <sup>110</sup> (2009)          | Escalation with additional tirofiban on top of clopidogrel and aspirin if HPR        | 263         | Periprocedural MI within 48 hours                                                           | TIMI major or minor bleeding                  | Randomization at time of PCI; Double-blind; superiority study   | 0%   | 20.4% vs. 35.1% (P=0.009)<br>1.5% vs. 0.8% (P=0.99)               |
| GRAVITAS <sup>111</sup> (2011)       | Escalation of clopidogrel to high-dose clopidogrel if HPR                            | 2,214       | Cardiac death, MI or ST at 6 months                                                         | Severe or moderate GUSTO bleeding at 6 months | Randomization at time of PCI; Double-blind, superiority study   | 40%  | 2.3% vs. 2.3% (P=0.97)<br>1.4% vs. 2.3% (P=0.10)                  |
| Wang et al. <sup>112</sup> (2011)    | Escalation of clopidogrel MD if HPR at multiple time points (max. 375 mg once daily) | 306         | Cardiac death, ST, recurrent ACS or revascularization at 12 months                          | TIMI major or minor bleeding at 12 months     | Randomization 1 mo. after PCI; Single-blind, superiority study  | 20%  | 9.3% vs. 20.4% (P=0.008)<br>12.9% vs. 16.6% (P=0.06)              |
| TRIGGER <sup>113</sup> (2012)        | Escalation of clopidogrel to prasugrel if HPR                                        | 423         | Cardiac death or MI at 6 months                                                             | TIMI major bleeding at 6 months               | Randomization at time of PCI; Double-blind, superiority study   | 0%   | Prematurely terminated for lack of futility                       |
| ARCTIC <sup>114</sup> (2012)         | Escalation of treatment at physician's discretion                                    | 2,440       | All-cause death, MI, ST, stroke or urgent revascularization at 1 year                       | STEEPLE major bleeding at 1 year              | Randomization at time of PCI; Open-label, superiority study     | 27%  | 34.6% vs. 31.1% (P=0.10)<br>2.3% vs. 3.3% (P=0.15)                |
| ANTARCTIC <sup>115</sup> (2016)      | Escalation and de-escalation of prasugrel based on PFT                               | 877         | Cardiac death, MI, stroke, ST, urgent revascularization or BARC type 2-5 bleeding at 1 year | BARC type 2-5 bleeding at 1 year              | Randomization at time of PCI; Open-label, superiority study     | 100% | 28% vs. 28% (P=0.98)<br>21% vs. 20% (P=0.77)                      |
| TROPICAL-ACS <sup>116</sup> (2017)   | De-escalation of prasugrel to clopidogrel based on PFT                               | 2,610       | Cardiac death, MI, stroke or BARC type 2-5 bleeding at 1 year                               | BARC type 2-5 bleeding at 1 year              | Randomization at time of PCI; Open-label, non-inferiority study | 100% | 7.3% vs. 9.0% (P <sub>NI</sub> <0.0004)<br>4.9% vs. 6.1% (P=0.23) |
| CREATIVE <sup>117*</sup> (2018)      | Escalation of clopidogrel to high-dose clopidogrel or adjunctive cilostazol if HPR   | 1,078       | All-cause death, MI, TVR or stroke at 18 months                                             | BARC type 3 or 5 bleeding at 18 months        | Randomization at time of PCI; Open-label, superiority study     | 60%  | 8.5% vs. 14.4% (P<0.05)<br>2.53% vs. 1.93% (P>0.05)               |

Abbreviations: ACS=acute coronary syndrome; BARC=Bleeding Academic Research Consortium; DAPT=dual antiplatelet therapy; GUSTO=Global Utilization Of Streptokinase and Tpa for Occluded arteries; HPR=high platelet reactivity; LD=loading dose; MD=maintenance dose; MI=myocardial infarction; PCI=percutaneous coronary intervention; PFT=platelet function testing; ST=stent thrombosis; STEEPLE=Safety and Efficacy of Enoxaparin in PCI Patients, an International Randomized Evaluation; TIMI=Thrombolysis in Myocardial Infarction; TVR=target vessel revascularization

\* Results are from the comparison between the adjunctive cilostazol group versus normal-dose clopidogrel group, results for the high-dose clopidogrel group were not statistically different from normal-dose clopidogrel and are not presented in this table.

**Supplementary Table 11.** Randomized controlled trials comparing genotype-guided dual antiplatelet therapy with standard antiplatelet therapy

| Study (year)                           | Intervention Strategy                                                                | Sample Size | Primary Endpoint                                                      | Secondary Endpoint                      | Design and Randomization                                                | ACS  | Primary and Secondary Results (guided vs. non-guided therapy)     |
|----------------------------------------|--------------------------------------------------------------------------------------|-------------|-----------------------------------------------------------------------|-----------------------------------------|-------------------------------------------------------------------------|------|-------------------------------------------------------------------|
| RAPID GENE <sup>118*</sup> (2012)      | Escalation of clopidogrel to prasugrel for CYP2C19*2 carriers                        | 187         | HPR (defined as PRU > 234) at 7 days after PCI                        | N/A                                     | Randomization at time of PCI; Open-label, superiority study             | 37%  | 0% vs. 30% (P=0.0092)                                             |
| IAC-PCI <sup>119†</sup> (2013)         | Escalation of clopidogrel to high-dose clopidogrel based on genotype                 | 600         | All-cause death, MI, stroke or TVR at 180 days                        | Bleeding event at 180 days              | Randomization at time of PCI; Single-blind, superiority study           | N/A  | 2.66% vs. 9.03% (P<0.01)<br>1.33% vs. 3.68% (P=0.073)             |
| PHARMCLO <sup>120‡</sup> (2018)        | Treatment at physician's discretion based on genetic and clinical characteristics    | 888         | Cardiac death, MI, stroke or BARC type 3-5 major bleeding at 1 year   | N/A                                     | Randomization at time of ACS diagnosis; Single-blind, superiority study | 100% | 15.9% vs. 25.9% (P<0.001)                                         |
| POPular Genetics <sup>121</sup> (2019) | De-escalation of ticagrelor or prasugrel to clopidogrel for CYP2C19*2 or *3 carriers | 2,488       | Cardiac death, MI, ST, stroke or PLATO major bleeding at 1 year       | PLATO major or minor bleeding at 1 year | Randomization within 2 days of PCI; Open-label, non-inferiority study   | 100% | 5.1% vs. 5.9% (P <sub>NI</sub> <0.001)<br>9.8% vs. 12.5% (P=0.04) |
| TAILOR PCI <sup>122</sup> (2020)       | Escalation of clopidogrel to ticagrelor for CYP2C19*2 or *3 carriers                 | 5,302       | Cardiac death, MI, stroke, ST and severe recurrent ischemia at 1 year | TIMI major or minor bleeding at 1 year  | Randomization at time of PCI; Open-label, superiority study             | 84%  | 4.0% vs. 5.9% (P=0.056)<br>1.9% vs. 1.6% (P>0.05)                 |

Abbreviations: ACS=acute coronary syndrome; BARC=Bleeding Academic Research Consortium; DAPT=dual antiplatelet therapy; DES=drug-eluting stent; HPR=high platelet reactivity; MI=myocardial infarction; PCI=percutaneous coronary intervention; PRU=P2Y<sub>12</sub> reactivity unit; ST=stent thrombosis; TIMI=Thrombolysis in Myocardial Infarction; TVR=target vessel revascularization

\* Results for the CYP2C19\*2 carriers within the total population

† Homozygous CYP2C19\*2 or \*3 received 200 mg loading dose of cilostazol and 100 mg twice daily for maintenance on top of high-dose clopidogrel

‡ The PHARMCLO trial was prematurely stopped after enrollment of only 25% of the original goal

## References

1. Kim BK, Hong MK, Shin DH, Nam CM, Kim JS, Ko YG, Choi D, Kang TS, Park BE, Kang WC, Lee SH, Yoon JH, Hong BK, Kwon HM, Jang Y. A new strategy for discontinuation of dual antiplatelet therapy: the RESET Trial (REal Safety and Efficacy of 3-month dual antiplatelet Therapy following Endeavor zotarolimus-eluting stent implantation). *J Am Coll Cardiol* 2012;**60**(15):1340-8.
2. Feres F, Costa RA, Abizaid A, Leon MB, Marin-Neto JA, Botelho RV, King SB, 3rd, Negoita M, Liu M, de Paula JE, Mangione JA, Meireles GX, Castello HJ, Jr., Nicolela EL, Jr., Perin MA, Devito FS, Labrunie A, Salvadori D, Jr., Gusmao M, Staico R, Costa JR, Jr., de Castro JP, Abizaid AS, Bhatt DL. Three vs twelve months of dual antiplatelet therapy after zotarolimus-eluting stents: the OPTIMIZE randomized trial. *JAMA* 2013;**310**(23):2510-22.
3. De Luca G, Damen SA, Camaro C, Benit E, Verdoia M, Rasoul S, Liew HB, Polad J, Ahmad WA, Zambahari R, Postma S, Kedhi E, Suryapranata H. Final results of the Randomised Evaluation of short-term DUal antiplatelet therapy in patients with acute Coronary syndromE treated with a new generation stent (REDUCE) trial. *EuroIntervention* 2019.
4. Gwon HC, Hahn JY, Park KW, Song YB, Chae IH, Lim DS, Han KR, Choi JH, Choi SH, Kang HJ, Koo BK, Ahn T, Yoon JH, Jeong MH, Hong TJ, Chung WY, Choi YJ, Hur SH, Kwon HM, Jeon DW, Kim BO, Park SH, Lee NH, Jeon HK, Jang Y, Kim HS. Six-month versus 12-month dual antiplatelet therapy after implantation of drug-eluting stents: the Efficacy of Xience/Promus Versus Cypher to Reduce Late Loss After Stenting (EXCELLENT) randomized, multicenter study. *Circulation* 2012;**125**(3):505-13.
5. Schulz-Schupke S, Byrne RA, Ten Berg JM, Neumann FJ, Han Y, Adriaenssens T, Tolg R, Seyfarth M, Maeng M, Zrenner B, Jacobshagen C, Mudra H, von Hodenberg E, Wohrle J, Angiolillo DJ, von Merzljak B, Rifatov N, Kufner S, Morath T, Feuchtenberger A, Ibrahim T, Janssen PW, Valina C, Li Y, Desmet W, Abdel-Wahab M, Tiroch K, Hengstenberg C, Bernlochner I, Fischer M, Schunkert H, Laugwitz KL, Schomig A, Mehilli J, Kastrati A. ISAR-SAFE: a randomized, double-blind, placebo-controlled trial of 6 vs. 12 months of clopidogrel therapy after drug-eluting stenting. *Eur Heart J* 2015;**36**(20):1252-63.
6. Han Y, Xu B, Xu K, Guan C, Jing Q, Zheng Q, Li X, Zhao X, Wang H, Zhao X, Li X, Yu P, Zang H, Wang Z, Cao X, Zhang J, Pang W, Li J, Yang Y, Dangas GD. Six Versus 12 Months of Dual Antiplatelet Therapy After Implantation of Biodegradable Polymer Sirolimus-Eluting Stent: Randomized Substudy of the I-LOVE-IT 2 Trial. *Circ Cardiovasc Interv* 2016;**9**(2):e003145.
7. Hong SJ, Shin DH, Kim JS, Kim BK, Ko YG, Choi D, Her AY, Kim YH, Jang Y, Hong MK. 6-Month Versus 12-Month Dual-Antiplatelet Therapy Following Long Everolimus-Eluting Stent Implantation: The IVUS-XPL Randomized Clinical Trial. *JACC Cardiovasc Interv* 2016;**9**(14):1438-46.
8. Hahn JY, Song YB, Oh JH, Cho DK, Lee JB, Doh JH, Kim SH, Jeong JO, Bae JH, Kim BO, Cho JH, Suh IW, Kim DI, Park HK, Park JS, Choi WG, Lee WS, Kim J, Choi KH, Park TK, Lee JM, Yang JH, Choi JH, Choi SH, Gwon HC. 6-month versus 12-month or longer dual antiplatelet therapy after percutaneous coronary intervention in patients with acute coronary syndrome (SMART-DATE): a randomised, open-label, non-inferiority trial. *Lancet* 2018;**391**(10127):1274-1284.
9. Kedhi E, Fabris E, van der Ent M, Buszman P, von Birgelen C, Roolvink V, Zurakowski A, Schotborgh CE, Hoorntje JCA, Eek CH, Cook S, Togni M, Meuwissen M, van Royen N, van Vliet R, Wedel H, Delewi R, Zijlstra F. Six months versus 12 months dual antiplatelet therapy after drug-eluting stent implantation in ST-elevation myocardial infarction (DAPT-STEMI): randomised, multicentre, non-inferiority trial. *BMJ* 2018;**363**:k3793.
10. Colombo A, Chieffo A, Frasheri A, Garbo R, Masotti-Centol M, Salvatella N, Oteo Dominguez JF, Steffanon L, Tarantini G, Presbitero P, Menozzi A, Pucci E, Mauri J, Cesana BM, Giustino G, Sardella G. Second-generation drug-eluting stent implantation followed by 6- versus 12-month dual antiplatelet therapy: the SECURITY randomized clinical trial. *J Am Coll Cardiol* 2014;**64**(20):2086-97.
11. Valgimigli M, Borghesi M, Tebaldi M, Vranckx P, Parrinello G, Ferrari R. Should duration of dual antiplatelet therapy depend on the type and/or potency of implanted stent? A pre-specified analysis from the PROlonging Dual antiplatelet treatment after Grading stent-induced Intimal hyperplasia studY (PRODIGY). *Eur Heart J* 2013;**34**(12):909-19.

12. Didier R, Morice MC, Barragan P, Noryani AAL, Noor HA, Majwal T, Hovasse T, Castellant P, Schneeberger M, Maillard L, Bressolette E, Wojcik J, Delarche N, Blanchard D, Jouve B, Ormezzano O, Paganelli F, Levy G, Sainsous J, Carrie D, Furber A, Berlan J, Darremont O, Le Breton H, Lyuyex-Bore A, Gommeaux A, Cassat C, Kermarrec A, Cazaux P, Druelles P, Dauphin R, Armengaud J, Dupouy P, Champagnac D, Ohlmann P, Ben Amer H, Kiss RG, Ungi I, Gilard M. 6- Versus 24-Month Dual Antiplatelet Therapy After Implantation of Drug-Eluting Stents in Patients Nonresistant to Aspirin: Final Results of the ITALIC Trial (Is There a Life for DES After Discontinuation of Clopidogrel). *JACC Cardiovasc Interv* 2017;**10**(12):1202-1210.
13. Vranckx P, Valgimigli M, Juni P, Hamm C, Steg PG, Heg D, van Es GA, McFadden EP, Onuma Y, van Meijeren C, Chichareon P, Benit E, Mollmann H, Janssens L, Ferrario M, Moschovitis A, Zurakowski A, Dominici M, Van Geuns RJ, Huber K, Slagboom T, Serruys PW, Windecker S. Ticagrelor plus aspirin for 1 month, followed by ticagrelor monotherapy for 23 months vs aspirin plus clopidogrel or ticagrelor for 12 months, followed by aspirin monotherapy for 12 months after implantation of a drug-eluting stent: a multicentre, open-label, randomised superiority trial. *Lancet* 2018;**392**(10151):940-949.
14. Watanabe H, Domei T, Morimoto T, Natsuaki M, Shiomi H, Toyota T, Ohya M, Suwa S, Takagi K, Nanasato M, Hata Y, Yagi M, Suematsu N, Yokomatsu T, Takamisawa I, Doi M, Noda T, Okayama H, Seino Y, Tada T, Sakamoto H, Hibi K, Abe M, Kawai K, Nakao K, Ando K, Tanabe K, Ikari Y, Hanaoka KI, Morino Y, Kozuma K, Kadota K, Furukawa Y, Nakagawa Y, Kimura T, Investigators S-. Effect of 1-Month Dual Antiplatelet Therapy Followed by Clopidogrel vs 12-Month Dual Antiplatelet Therapy on Cardiovascular and Bleeding Events in Patients Receiving PCI: The STOPDAPT-2 Randomized Clinical Trial. *JAMA* 2019;**321**(24):2414-2427.
15. Hahn JY, Song YB, Oh JH, Chun WJ, Park YH, Jang WJ, Im ES, Jeong JO, Cho BR, Oh SK, Yun KH, Cho DK, Lee JY, Koh YY, Bae JW, Choi JW, Lee WS, Yoon HJ, Lee SU, Cho JH, Choi WG, Rha SW, Lee JM, Park TK, Yang JH, Choi JH, Choi SH, Lee SH, Gwon HC. Effect of P2Y12 Inhibitor Monotherapy vs Dual Antiplatelet Therapy on Cardiovascular Events in Patients Undergoing Percutaneous Coronary Intervention: The SMART-CHOICE Randomized Clinical Trial. *JAMA* 2019;**321**(24):2428-2437.
16. Kim B-K, Hong S-J, Cho Y-H, Yun KH, Kim YH, Suh Y, Cho JY, Her A-Y, Cho S, Jeon DW, Yoo S-Y, Cho D-K, Hong B-K, Kwon H, Ahn C-M, Shin D-H, Nam C-M, Kim J-S, Ko Y-G, Choi D, Hong M-K, Jang Y, Investigators ftT. Effect of Ticagrelor Monotherapy vs Ticagrelor With Aspirin on Major Bleeding and Cardiovascular Events in Patients With Acute Coronary Syndrome: The TICO Randomized Clinical Trial. *JAMA* 2020;**323**(23):2407-2416.
17. Mehran R, Baber U, Sharma SK, Cohen DJ, Angiolillo DJ, Briguori C, Cha JY, Collier T, Dangas G, Dudek D, Dzavik V, Escaned J, Gil R, Gurbel P, Hamm CW, Henry T, Huber K, Kastrati A, Kaul U, Kornowski R, Krucoff M, Kunadian V, Marx SO, Mehta SR, Moliterno D, Ohman EM, Oldroyd K, Sardella G, Sartori S, Shlofmitz R, Steg PG, Weisz G, Witzenbichler B, Han YL, Pocock S, Gibson CM. Ticagrelor with or without Aspirin in High-Risk Patients after PCI. *N Engl J Med* 2019.
18. Nakamura M, Iijima R, Ako J, Shinke T, Okada H, Ito Y, Ando K, Anzai H, Tanaka H, Ueda Y, Takiuchi S, Nishida Y, Ohira H, Kawaguchi K, Kadotani M, Niinuma H, Omiya K, Morita T, Zen K, Yasaka Y, Inoue K, Ishiwata S, Ochiai M, Hamasaki T, Yokoi H. Dual Antiplatelet Therapy for 6 Versus 18 Months After Biodegradable Polymer Drug-Eluting Stent Implantation. *JACC Cardiovasc Interv* 2017;**10**(12):1189-1198.
19. Collet JP, Silvain J, Barthelemy O, Range G, Cayla G, Van Belle E, Cuisset T, Elhadad S, Schiele F, Lhoest N, Ohlmann P, Carrie D, Rousseau H, Aubry P, Monsegu J, Sabouret P, O'Connor SA, Abtan J, Kerneis M, Saint-Etienne C, Beygui F, Vicaut E, Montalescot G. Dual-antiplatelet treatment beyond 1 year after drug-eluting stent implantation (ARCTIC-Interruption): a randomised trial. *Lancet* 2014;**384**(9954):1577-85.
20. Mauri L, Kereiakes DJ, Yeh RW, Driscoll-Shempp P, Cutlip DE, Steg PG, Normand SL, Braunwald E, Wiviott SD, Cohen DJ, Holmes DR, Jr., Krucoff MW, Hermiller J, Dauerman HL, Simon DI, Kandzari DE, Garratt KN, Lee DP, Pow TK, Ver Lee P, Rinaldi MJ, Massaro JM. Twelve or 30 months of dual antiplatelet therapy after drug-eluting stents. *N Engl J Med* 2014;**371**(23):2155-66.
21. Lee CW, Ahn JM, Park DW, Kang SJ, Lee SW, Kim YH, Park SW, Han S, Lee SG, Seong IW, Rha SW, Jeong MH, Lim DS, Yoon JH, Hur SH, Choi YS, Yang JY, Lee NH, Kim HS, Lee BK, Kim KS, Lee SU, Chae JK, Cheong SS, Suh IW, Park HS, Nah DY, Jeon DS, Seung KB, Lee K, Jang JS,

- Park SJ. Optimal duration of dual antiplatelet therapy after drug-eluting stent implantation: a randomized, controlled trial. *Circulation* 2014;**129**(3):304-12.
22. Helft G, Steg PG, Le Feuvre C, Georges JL, Carrie D, Dreyfus X, Furber A, Leclercq F, Eltchaninoff H, Falquier JF, Henry P, Cattan S, Sebah L, Michel PL, Tuambilangana A, Hammoudi N, Boccara F, Cayla G, Douard H, Diallo A, Berman E, Komajda M, Metzger JP, Vicaut E. Stopping or continuing clopidogrel 12 months after drug-eluting stent placement: the OPTIDUAL randomized trial. *Eur Heart J* 2016;**37**(4):365-74.
23. Bonaca MP, Bhatt DL, Cohen M, Steg PG, Storey RF, Jensen EC, Magnani G, Bansilal S, Fish MP, Im K, Bengtsson O, Oude Ophuis T, Budaj A, Theroux P, Ruda M, Hamm C, Goto S, Spinar J, Nicolau JC, Kiss RG, Murphy SA, Wiviott SD, Held P, Braunwald E, Sabatine MS. Long-term use of ticagrelor in patients with prior myocardial infarction. *N Engl J Med* 2015;**372**(19):1791-800.
24. Steg PG, Bhatt DL, Simon T, Fox K, Mehta SR, Harrington RA, Held C, Andersson M, Himmelmann A, Ridderstråle W, Leonsson-Zachrisson M, Liu Y, Opolski G, Zateyshchikov D, Ge J, Nicolau JC, Corbalán R, Cornel JH, Widimský P, Leiter LA. Ticagrelor in Patients with Stable Coronary Disease and Diabetes. *N Engl J Med* 2019;**381**(14):1309-1320.
25. Oldgren J, Budaj A, Granger CB, Khder Y, Roberts J, Siegbahn A, Tijssen JG, Van de Werf F, Wallentin L. Dabigatran vs. placebo in patients with acute coronary syndromes on dual antiplatelet therapy: a randomized, double-blind, phase II trial. *Eur Heart J* 2011;**32**(22):2781-9.
26. Alexander JH, Becker RC, Bhatt DL, Cools F, Crea F, Dellborg M, Fox KA, Goodman SG, Harrington RA, Huber K, Husted S, Lewis BS, Lopez-Sendon J, Mohan P, Montalescot G, Ruda M, Ruzyllo W, Verheugt F, Wallentin L. Apixaban, an oral, direct, selective factor Xa inhibitor, in combination with antiplatelet therapy after acute coronary syndrome: results of the Apixaban for Prevention of Acute Ischemic and Safety Events (APPRAISE) trial. *Circulation* 2009;**119**(22):2877-85.
27. Mega JL, Braunwald E, Mohanavelu S, Burton P, Poulter R, Misselwitz F, Hricak V, Barnathan ES, Bordes P, Witkowski A, Markov V, Oppenheimer L, Gibson CM. Rivaroxaban versus placebo in patients with acute coronary syndromes (ATLAS ACS-TIMI 46): a randomised, double-blind, phase II trial. *The Lancet* 2009;**374**(9683):29-38.
28. Alexander JH, Lopes RD, James S, Kilaru R, He Y, Mohan P, Bhatt DL, Goodman S, Verheugt FW, Flather M, Huber K, Liaw D, Husted SE, Lopez-Sendon J, De Caterina R, Jansky P, Darius H, Vinereanu D, Cornel JH, Cools F, Atar D, Leiva-Pons JL, Keltai M, Ogawa H, Pais P, Parkhomenko A, Ruzyllo W, Diaz R, White H, Ruda M, Geraldes M, Lawrence J, Harrington RA, Wallentin L. Apixaban with antiplatelet therapy after acute coronary syndrome. *N Engl J Med* 2011;**365**(8):699-708.
29. Mega JL, Braunwald E, Wiviott SD, Bassand J-P, Bhatt DL, Bode C, Burton P, Cohen M, Cook-Bruns N, Fox KAA, Goto S, Murphy SA, Plotnikov AN, Schneider D, Sun X, Verheugt FWA, Gibson CM. Rivaroxaban in Patients with a Recent Acute Coronary Syndrome. *N Engl J Med* 2011;**366**(1):9-19.
30. Eikelboom JW, Connolly SJ, Bosch J, Dagenais GR, Hart RG, Shestakovska O, Diaz R, Alings M, Lonn EM, Anand SS, Widimsky P, Hori M, Avezum A, Piegas LS, Branch KRH, Probstfield J, Bhatt DL, Zhu J, Liang Y, Maggioni AP, Lopez-Jaramillo P, O'Donnell M, Kakkar AK, Fox KAA, Parkhomenko AN, Ertl G, Störk S, Keltai M, Ryden L, Pogossova N, Dans AL, Lanans F, Commerford PJ, Torp-Pedersen C, Guzik TJ, Verhamme PB, Vinereanu D, Kim J-H, Tonkin AM, Lewis BS, Felix C, Yusuf S, Steg PG, Metsarinne KP, Cook-Bruns N, Misselwitz F, Chen E, Leong D, Yusuf S. Rivaroxaban with or without Aspirin in Stable Cardiovascular Disease. *N Engl J Med* 2017;**377**(14):1319-1330.
31. Ohman EM, Roe MT, Steg PG, James SK, Povsic TJ, White J, Rockhold F, Plotnikov A, Mundl H, Strony J, Sun X, Husted S, Tendera M, Montalescot G, Bahit MC, Ardissino D, Bueno H, Claeys MJ, Nicolau JC, Cornel JH, Goto S, Kiss RG, Güray Ü, Park DW, Bode C, Welsh RC, Gibson CM. Clinically significant bleeding with low-dose rivaroxaban versus aspirin, in addition to P2Y12 inhibition, in acute coronary syndromes (GEMINI-ACS-1): a double-blind, multicentre, randomised trial. *Lancet* 2017;**389**(10081):1799-1808.
32. Zhang YJ, Iqbal J, van Klaveren D, Campos CM, Holmes DR, Kappetein AP, Morice MC, Banning AP, Grech ED, Bourantas CV, Onuma Y, Garcia-Garcia HM, Mack MJ, Colombo A, Mohr FW, Steyerberg EW, Serruys PW. Smoking is associated with adverse clinical outcomes in patients undergoing revascularization with PCI or CABG: the SYNTAX trial at 5-year follow-up. *J Am Coll Cardiol* 2015;**65**(11):1107-15.



33. Ko DT, Yun L, Wijeyesundera HC, Jackevicius CA, Rao SV, Austin PC, Marquis JF, Tu JV. Incidence, predictors, and prognostic implications of hospitalization for late bleeding after percutaneous coronary intervention for patients older than 65 years. *Circ Cardiovasc Interv* 2010;**3**(2):140-7.
34. Pepine CJ, Kowey PR, Kupfer S, Kolloch RE, Benetos A, Mancia G, Coca A, Cooper-DeHoff RM, Handberg E, Gaxiola E, Sleight P, Conti CR, Hewkin AC, Tavazzi L. Predictors of adverse outcome among patients with hypertension and coronary artery disease. *J Am Coll Cardiol* 2006;**47**(3):547-51.
35. Costa F, van Klaveren D, James S, Heg D, Raber L, Feres F, Pilgrim T, Hong MK, Kim HS, Colombo A, Steg PG, Zanchin T, Palmerini T, Wallentin L, Bhatt DL, Stone GW, Windecker S, Steyerberg EW, Valgimigli M. Derivation and validation of the predicting bleeding complications in patients undergoing stent implantation and subsequent dual antiplatelet therapy (PRECISE-DAPT) score: a pooled analysis of individual-patient datasets from clinical trials. *Lancet* 2017;**389**(10073):1025-1034.
36. Yeh RW, Secemsky EA, Kereiakes DJ, Normand SL, Gershlick AH, Cohen DJ, Spertus JA, Steg PG, Cutlip DE, Rinaldi MJ, Camenzind E, Wijns W, Apruzzese PK, Song Y, Massaro JM, Mauri L. Development and Validation of a Prediction Rule for Benefit and Harm of Dual Antiplatelet Therapy Beyond 1 Year After Percutaneous Coronary Intervention. *Jama* 2016;**315**(16):1735-49.
37. Kikkert WJ, Hassell ME, Delewi R, van der Laan MH, Baan J, Jr., Vis MM, Koch KT, de Winter RJ, Piek JJ, Tijssen JG, Henriques JP. Predictors and prognostic consequence of gastrointestinal bleeding in patients with ST-segment elevation myocardial infarction. *Int J Cardiol* 2015;**184**:128-34.
38. Lemesle G, Meurice T, Tricot O, Lamblin N, Bauters C. Association of Diabetic Status and Glycemic Control With Ischemic and Bleeding Outcomes in Patients With Stable Coronary Artery Disease: The 5-Year CORONOR Registry. *J Am Heart Assoc* 2018;**7**(10).
39. Hamilos M, Petousis S, Xanthopoulou I, Goudevenos J, Kanakakis J, Sitafidis G, Vavouranakis M, Skalidis E, Kochiadakis G, Lekakis J, Vardas PE, Alexopoulos D. Antiplatelet treatment in diabetic patients with acute coronary syndrome undergoing percutaneous coronary intervention: a GREEK AntiPlatelet registry substudy. *Coron Artery Dis* 2018;**29**(1):53-59.
40. Lee CH, Ahn JM, Lee PH, Han M, Kang SH, Kang SJ, Lee SW, Kim YH, Lee CW, Park SW, Park DW, Park SJ. Comparative determinants of 5-year cardiovascular event rates in patients with unprotected left main coronary artery disease. *Coron Artery Dis* 2017;**28**(5):387-394.
41. Lin CC, Hu HY, Luo JC, Peng YL, Hou MC, Lin HC, Lee FY. Risk factors of gastrointestinal bleeding in clopidogrel users: a nationwide population-based study. *Aliment Pharmacol Ther* 2013;**38**(9):1119-28.
42. Tajik AA, Dobre D, Aguilar D, Kjekshus J, Zannad F, Dickstein K. A history of diabetes predicts outcomes following myocardial infarction: an analysis of the 28 771 patients in the High-Risk MI Database. *Eur J Heart Fail* 2017;**19**(5):635-642.
43. Palmerini T, Genereux P, Mehran R, Dangas G, Caixeta A, Riva DD, Mariani A, Xu K, Stone GW. Association among leukocyte count, mortality, and bleeding in patients with non-ST-segment elevation acute coronary syndromes (from the Acute Catheterization and Urgent Intervention Triage Strategy [ACUITY] trial). *Am J Cardiol* 2013;**111**(9):1237-45.
44. Lin MJ, Chen CY, Lin HD, Wu HP. Impact of diabetes and hypertension on cardiovascular outcomes in patients with coronary artery disease receiving percutaneous coronary intervention. *BMC Cardiovasc Disord* 2017;**17**(1):12.
45. Loutfi M, Sadaka MA, Sobhy M. Outcomes of DES in Diabetic and Nondiabetic Patients with Complex Coronary Artery Disease after Risk Stratification by the SYNTAX Score. *Clin Med Insights Cardiol* 2016;**10**:103-10.
46. Mathew V, Wilson SH, Barsness GW, Frye RL, Lennon R, Holmes DR. Comparative outcomes of percutaneous coronary interventions in diabetics vs non-diabetics with prior coronary artery bypass grafting. *Eur Heart J* 2002;**23**(18):1456-64.
47. Baber U, Mehran R, Giustino G, Cohen DJ, Henry TD, Sartori S, Ariti C, Litherland C, Dangas G, Gibson CM, Krucoff MW, Moliterno DJ, Kirtane AJ, Stone GW, Colombo A, Chieffo A, Kini AS, Witzenbichler B, Weisz G, Steg PG, Pocock S. Coronary Thrombosis and Major Bleeding After PCI With Drug-Eluting Stents: Risk Scores From PARIS. *J Am Coll Cardiol* 2016;**67**(19):2224-2234.

48. Bavry AA, Kumbhani DJ, Gong Y, Handberg EM, Cooper-Dehoff RM, Pepine CJ. Simple integer risk score to determine prognosis of patients with hypertension and chronic stable coronary artery disease. *J Am Heart Assoc* 2013;**2**(4):e000205.
49. Bhatt DL, Eagle KA, Ohman EM, Hirsch AT, Goto S, Mahoney EM, Wilson PW, Alberts MJ, D'Agostino R, Liao CS, Mas JL, Rother J, Smith SC, Jr., Salette G, Contant CF, Massaro JM, Steg PG. Comparative determinants of 4-year cardiovascular event rates in stable outpatients at risk of or with atherothrombosis. *Jama* 2010;**304**(12):1350-7.
50. Vanassche T, Verhamme P, Anand SS, Shestakovska O, Fox KAA, Bhatt DL, Avezum A, Alings M, Aboyans V, Maggioni AP, Widimsky P, Berkowitz SD, Yusuf S, Connolly SJ, Eikelboom JW, Bosch J. Risk factors and clinical outcomes in chronic coronary and peripheral artery disease: An analysis of the randomized, double-blind COMPASS trial. *European Journal of Preventive Cardiology* 2019;2047487319882154.
51. Miao B, Hernandez AV, Alberts MJ, Mangiafico N, Roman YM, Coleman CI. Incidence and Predictors of Major Adverse Cardiovascular Events in Patients With Established Atherosclerotic Disease or Multiple Risk Factors. *J Am Heart Assoc* 2020;**9**(2):e014402.
52. Kikkert WJ, Hoebers LP, Damman P, Lieve KV, Claessen BE, Vis MM, Baan J, Jr., Koch KT, de Winter RJ, Piek JJ, Tijssen JG, Henriques JP. Recurrent myocardial infarction after primary percutaneous coronary intervention for ST-segment elevation myocardial infarction. *Am J Cardiol* 2014;**113**(2):229-35.
53. Tomaniak M, Chichareon P, Klimczak-Tomaniak D, Takahashi K, Kogame N, Modolo R, Wang R, Ono M, Hara H, Gao C, Kawashima H, Rademaker-Havinga T, Garg S, Curzen N, Haude M, Kochman J, Gori T, Montalescot G, Angiolillo DJ, Capodanno D, Storey RF, Hamm C, Vranckx P, Valgimigli M, Windecker S, Onuma Y, Serruys PW, Anderson R. Impact of renal function on clinical outcomes after PCI in ACS and stable CAD patients treated with ticagrelor: a prespecified analysis of the GLOBAL LEADERS randomized clinical trial. *Clin Res Cardiol* 2020.
54. Bernaudo D, Coll R, Sanchez Munoz-Torrero JF, Pascual MT, Garcia-Diaz AM, Alvarez LR, Monreal M. Renal function and short-term outcome in stable outpatients with coronary, cerebrovascular or peripheral artery disease. *Atherosclerosis* 2013;**229**(1):258-62.
55. Saltzman AJ, Stone GW, Claessen BE, Narula A, Leon-Reyes S, Weisz G, Brodie B, Witzenbichler B, Guagliumi G, Kornowski R, Dudek D, Metzger DC, Lansky AJ, Nikolsky E, Dangas GD, Mehran R. Long-term impact of chronic kidney disease in patients with ST-segment elevation myocardial infarction treated with primary percutaneous coronary intervention: the HORIZONS-AMI (Harmonizing Outcomes With Revascularization and Stents in Acute Myocardial Infarction) trial. *JACC Cardiovasc Interv* 2011;**4**(9):1011-9.
56. Dan K, Miyoshi T, Ueeda M, Ohtsuka H, Ugawa S, Ohnishi N, Takaishi A, Nakamura K, Kusano K, Ito H. Impact of chronic kidney disease on left main coronary artery disease and prognosis in Japanese patients. *Circ J* 2012;**76**(9):2266-72.
57. Ninomiya T, Kiyohara Y, Kubo M, Tanizaki Y, Doi Y, Okubo K, Wakugawa Y, Hata J, Oishi Y, Shikata K, Yonemoto K, Hirakata H, Iida M. Chronic kidney disease and cardiovascular disease in a general Japanese population: the Hisayama Study. *Kidney Int* 2005;**68**(1):228-36.
58. Buckley BS, Simpson CR, McLernon DJ, Murphy AW, Hannaford PC. Five year prognosis in patients with angina identified in primary care: incident cohort study. *Bmj* 2009;**339**:b3058.
59. Manzano-Fernandez S, Marin F, Pastor-Perez FJ, Caro C, Cambronero F, Lacunza J, Pinar E, Pascual-Figal DA, Valdes M, Lip GYH. Impact of chronic kidney disease on major bleeding complications and mortality in patients with indication for oral anticoagulation undergoing coronary stenting. *Chest* 2009;**135**(4):983-990.
60. Chonchol MB, Aboyans V, Lacroix P, Smits G, Berl T, Laskar M. Long-term outcomes after coronary artery bypass grafting: preoperative kidney function is prognostic. *J Thorac Cardiovasc Surg* 2007;**134**(3):683-9.
61. Honda Y, Yamawaki M, Hirano K, Araki M, Kobayashi N, Sakamoto Y, Mori S, Tsutumi M, Takama T, Tokuda T, Makino K, Shirai S, Ito Y. New scoring model (DARSYM score) to predict post-discharge bleeding after successful second-generation drug-eluting stent implantation. *Heart Vessels* 2017;**32**(11):1285-1295.
62. Manzano-Fernández S, Pastor FJ, Marín F, Cambronero F, Caro C, Pascual-Figal DA, Garrido IP, Pinar E, Valdés M, Lip GYH. Increased Major Bleeding Complications Related to Triple

Antithrombotic Therapy Usage in Patients With Atrial Fibrillation Undergoing Percutaneous Coronary Artery Stenting. *CHEST* 2008;**134**(3):559-567.

63. Lemesle G, Tricot O, Meurice T, Lallemand R, Delomez M, Equine O, Lamblin N, Bauters C. Incident Myocardial Infarction and Very Late Stent Thrombosis in Outpatients With Stable Coronary Artery Disease. *J Am Coll Cardiol* 2017;**69**(17):2149-2156.

64. Arnold SV, Smolderen KG, Kennedy KF, Li Y, Shore S, Stolker JM, Wang TY, Jones PG, Zhao Z, Spertus JA. Risk factors for rehospitalization for acute coronary syndromes and unplanned revascularization following acute myocardial infarction. *J Am Heart Assoc* 2015;**4**(2).

65. Sorajja P, Gersh BJ, Cox DA, McLaughlin MG, Zimetbaum P, Costantini C, Stuckey T, Tchong JE, Mehran R, Lansky AJ, Grines CL, Stone GW. Impact of multivessel disease on reperfusion success and clinical outcomes in patients undergoing primary percutaneous coronary intervention for acute myocardial infarction. *Eur Heart J* 2007;**28**(14):1709-16.

66. Khan AA, Chung MJ, Novak E, Mori Brooks M, Brown DL. The long-term risk of smoking in diabetic patients with stable ischemic heart disease treated with intensive medical therapy and lifestyle modification. *Eur J Prev Cardiol* 2017;**24**(14):1506-1514.

67. Satoh H, Nishino T, Tomita K, Saijo Y, Kishi R, Tsutsui H. Risk factors and the incidence of coronary artery disease in young middle-aged Japanese men: results from a 10-year cohort study. *Intern Med* 2006;**45**(5):235-9.

68. Eriksson Ostman M, Calais F, Rosenblad A, Frobert O, Leppert J, Hedberg P. Prognostic impact of subclinical or manifest extracoronary artery diseases after acute myocardial infarction. *Atherosclerosis* 2017;**263**:53-59.

69. Inohara T, Pieper K, Wojdyla DM, Patel MR, Jones WS, Tricoci P, Mahaffey KW, James SK, Alexander JH, Lopes RD, Wallentin L, Ohman EM, Roe MT, Vemulapalli S. Incidence, timing, and type of first and recurrent ischemic events in patients with and without peripheral artery disease after an acute coronary syndrome. *Am Heart J* 2018;**201**:25-32.

70. Franzone A, Piccolo R, Gargiulo G, Ariotti S, Marino M, Santucci A, Baldo A, Magnani G, Moschovitis A, Windecker S, Valgimigli M. Prolonged vs Short Duration of Dual Antiplatelet Therapy After Percutaneous Coronary Intervention in Patients With or Without Peripheral Arterial Disease: A Subgroup Analysis of the PRODIGY Randomized Clinical Trial. *JAMA Cardiol* 2016;**1**(7):795-803.

71. Inglis SC, Bebachuk J, Al-Suhaim SA, Case J, Pfeffer MA, Solomon SD, Hou YR, Pitt B, Dargie HJ, Ford I, Kjekshus J, Zannad F, Dickstein K, McMurray JJ. Peripheral artery disease and outcomes after myocardial infarction: an individual-patient meta-analysis of 28,771 patients in CAPRICORN, EPEHESUS, OPTIMAAL and VALIANT. *Int J Cardiol* 2013;**168**(2):1094-101.

72. Giustino G, Chieffo A, Palmerini T, Valgimigli M, Feres F, Abizaid A, Costa RA, Hong MK, Kim BK, Jang Y, Kim HS, Park KW, Gilard M, Morice MC, Sawaya F, Sardella G, Genereux P, Redfors B, Leon MB, Bhatt DL, Stone GW, Colombo A. Efficacy and Safety of Dual Antiplatelet Therapy After Complex PCI. *J Am Coll Cardiol* 2016;**68**(17):1851-1864.

73. Yeh RW, Kereiakes DJ, Steg PG, Cutlip DE, Croce KJ, Massaro JM, Mauri L. Lesion Complexity and Outcomes of Extended Dual Antiplatelet Therapy After Percutaneous Coronary Intervention. *J Am Coll Cardiol* 2017;**70**(18):2213-2223.

74. Wang HY, Wang Y, Yin D, Gao RL, Yang YJ, Xu B, Dou KF. Percutaneous Coronary Intervention Complexity and Risk of Adverse Events in relation to High Bleeding Risk among Patients Receiving Drug-Eluting Stents: Insights from a Large Single-Center Cohort Study. *J Interv Cardiol* 2020;**2020**:2985435.

75. Bonaca MP, Storey RF, Bhatt DL, Steg PG, Cohen M, Im KP, Johanson P, Braunwald EP, Sabatine MS. Abstract 16658: Patient Selection for Long-Term Secondary Prevention With Ticagrelor: Insights From PEGASUS-TIMI 54. *Circulation* 2018;**138**(Suppl\_1):A16658-A16658.

76. Inohara T, Shrader P, Pieper K, Blanco RG, Allen LA, Fonarow GC, Gersh BJ, Go AS, Ezekowitz MD, Kowey PR, Reiffel JA, Naccarelli GV, Chan PS, Mahaffey KW, Singer DE, Freeman JV, Steinberg BA, Peterson ED, Piccini JP. Treatment of atrial fibrillation with concomitant coronary or peripheral artery disease: Results from the outcomes registry for better informed treatment of atrial fibrillation II. *Am Heart J* 2019;**213**:81-90.

77. Choi HI, Ahn JM, Kang SH, Lee PH, Kang SJ, Lee SW, Kim YH, Lee CW, Park SW, Park DW, Park SJ. Prevalence, Management, and Long-Term (6-Year) Outcomes of Atrial Fibrillation Among Patients Receiving Drug-Eluting Coronary Stents. *JACC Cardiovasc Interv* 2017;**10**(11):1075-1085.

78. Lopes RD, Rao M, Simon DN, Thomas L, Ansell J, Fonarow GC, Gersh BJ, Go AS, Hylek EM, Kowey P, Piccini JP, Singer DE, Chang P, Peterson ED, Mahaffey KW. Triple vs Dual Antithrombotic Therapy in Patients with Atrial Fibrillation and Coronary Artery Disease. *Am J Med* 2016;**129**(6):592-599.e1.
79. Mennuni MG, Halperin JL, Bansilal S, Schoos MM, Theodoropoulos KN, Meelu OA, Sartori S, Giacoppo D, Bernelli C, Moreno PR, Krishnan P, Baber U, Lucarelli C, Dangas GD, Sharma SK, Kini AS, Tamburino C, Chieffo A, Colombo A, Presbitero P, Mehran R. Balancing the Risk of Bleeding and Stroke in Patients With Atrial Fibrillation After Percutaneous Coronary Intervention (from the AVIATOR Registry). *Am J Cardiol* 2015;**116**(1):37-42.
80. Kalra PR, Greenlaw N, Ferrari R, Ford I, Tardif JC, Tendera M, Reid CM, Danchin N, Stepinska J, Steg PG, Fox KM. Hemoglobin and Change in Hemoglobin Status Predict Mortality, Cardiovascular Events, and Bleeding in Stable Coronary Artery Disease. *Am J Med* 2017;**130**(6):720-730.
81. Wester A, Attar R, Mohammad MA, Andell P, Hofmann R, Jensen J, Szummer K, Erlinge D, Koul S. Impact of Baseline Anemia in Patients With Acute Coronary Syndromes Undergoing Percutaneous Coronary Intervention: A Prespecified Analysis From the VALIDATE-SWEDEHEART Trial. *J Am Heart Assoc* 2019;**8**(16):e012741.
82. Faggioni M, Baber U, Sartori S, Chandrasekhar J, Cohen DJ, Henry TD, Claessen BE, Dangas GD, Gibson CM, Krucoff MW, Vogel B, Moliterno DJ, Sorrentino S, Colombo A, Chieffo A, Kini A, Farhan S, Ariti C, Witzenbichler B, Weisz G, Steg PG, Pocock S, Mehran R. Influence of Baseline Anemia on Dual Antiplatelet Therapy Cessation and Risk of Adverse Events After Percutaneous Coronary Intervention. *Circ Cardiovasc Interv* 2019;**12**(4):e007133.
83. Nakatsuma K, Shiomi H, Morimoto T, Watanabe H, Nakagawa Y, Furukawa Y, Kadota K, Ando K, Ono K, Shizuta S, Kimura T. Influence of a history of cancer on long-term cardiovascular outcomes after coronary stent implantation (an Observation from Coronary Revascularization Demonstrating Outcome Study-Kyoto Registry Cohort-2). *Eur Heart J Qual Care Clin Outcomes* 2018;**4**(3):200-207.
84. Kuo L, Chao TF, Liu CJ, Lin YJ, Chang SL, Lo LW, Hu YF, Tuan TC, Liao JN, Chung FP, Chen TJ, Lip GYH, Chen SA. Liver Cirrhosis in Patients With Atrial Fibrillation: Would Oral Anticoagulation Have a Net Clinical Benefit for Stroke Prevention? *J Am Heart Assoc* 2017;**6**(6).
85. Palmerini T, Mehran R, Dangas G, Nikolsky E, Witzenbichler B, Guagliumi G, Dudek D, Genereux P, Caixeta A, Rabbani L, Weisz G, Parise H, Fahy M, Xu K, Brodie B, Lansky A, Stone GW. Impact of leukocyte count on mortality and bleeding in patients with myocardial infarction undergoing primary percutaneous coronary interventions: analysis from the Harmonizing Outcome with Revascularization and Stent in Acute Myocardial Infarction trial. *Circulation* 2011;**123**(24):2829-37, 7 p following 2837.
86. Morici N, Tavecchia GA, Antolini L, Caporale MR, Cantoni S, Bertuccio P, Sacco A, Meani P, Viola G, Brunelli D, Oliva F, Lombardi F, Segreto A, Oreglia JA, La Vecchia C, Cattaneo M, Valgimigli M, Savonitto S. Use of PRECISE-DAPT Score and Admission Platelet Count to Predict Mortality Risk in Patients With Acute Coronary Syndrome. *Angiology* 2019;**70**(9):867-877.
87. Ito S, Watanabe H, Morimoto T, Yoshikawa Y, Shiomi H, Shizuta S, Ono K, Yamaji K, Soga Y, Hyodo M, Shirai S, Ando K, Horiuchi H, Kimura T. Impact of Baseline Thrombocytopenia on Bleeding and Mortality After Percutaneous Coronary Intervention. *Am J Cardiol* 2018;**121**(11):1304-1314.
88. Hakim DA, Dangas GD, Caixeta A, Nikolsky E, Lansky AJ, Moses JW, Claessen B, Sanidas E, White HD, Ohman EM, Manoukian SV, Fahy M, Mehran R, Stone GW. Impact of baseline thrombocytopenia on the early and late outcomes after ST-elevation myocardial infarction treated with primary angioplasty: analysis from the Harmonizing Outcomes with Revascularization and Stents in Acute Myocardial Infarction (HORIZONS-AMI) trial. *Am Heart J* 2011;**161**(2):391-6.
89. Abu-Assi E, Raposeiras-Roubin S, Cobas-Paz R, Caneiro-Queija B, Martinez-Reglero C, Rodriguez-Rodriguez JM, Baz A, Iniguez-Romo A. Assessing the performance of the PRECISE-DAPT and PARIS risk scores for predicting one-year out-of-hospital bleeding in acute coronary syndrome patients. *EuroIntervention* 2018;**13**(16):1914-1922.
90. Choi SY, Kim MH, Cho YR, Sung Park J, Min Lee K, Park TH, Yun SC. Performance of PRECISE-DAPT Score for Predicting Bleeding Complication During Dual Antiplatelet Therapy. *Circ Cardiovasc Interv* 2018;**11**(12):e006837.

91. Pavasini R, Maietti E, Tonet E, Bugani G, Tebaldi M, Biscaglia S, Cimaglia P, Serenelli M, Ruggiero R, Vitali F, Galvani M, Minarelli M, Rubboli A, Bernucci D, Volpato S, Campo G. Bleeding Risk Scores and Scales of Frailty for the Prediction of Haemorrhagic Events in Older Adults with Acute Coronary Syndrome: Insights from the FRASER study. *Cardiovasc Drugs Ther* 2019;**33**(5):523-532.
92. Bianco M, D'Ascenzo F, Raposeiras Roubin S, Kinnaird T, Peyracchia M, Ariza-Solé A, Cerrato E, Manzano-Fernández S, Gravinese C, Templin C, Destefanis P, Velicki L, Luciano A, Xanthopoulou I, Rinaldi M, Rognoni A, Varbella F, Boccuzzi G, Omedè P, Montabone A, Bernardi A, Taha S, Rossini R, Durante A, Gili S, Magnani G, Autelli M, Grosso A, Blanco PF, Giustetto C, Garay A, Quadri G, Queija BC, Srdanovic I, Paz RC, Fernández MC, Pousa IM, Gallo D, Morbiducci U, Dominguez-Rodriguez A, Lopez-Cuenca Á, Cequier A, Alexopoulos D, Iñiguez-Romo A, Pozzi R, Assi EA, Valgimigli M. Comparative external validation of the PRECISE-DAPT and PARIS risk scores in 4424 acute coronary syndrome patients treated with prasugrel or ticagrelor. *Int J Cardiol* 2020;**301**:200-206.
93. Ueki Y, Bär S, Losdat S, Otsuka T, Zanchin C, Zanchin T, Gragnano F, Gargiulo G, Siontis GCM, Praz F, Lanz J, Hunziker L, Stortecky S, Pilgrim T, Heg D, Valgimigli M, Windecker S, Räber L. Validation of the Academic Research Consortium for High Bleeding Risk (ARC-HBR) criteria in patients undergoing percutaneous coronary intervention and comparison with contemporary bleeding risk scores. *EuroIntervention* 2020;**16**(5):371-379.
94. Martí D, Carballeira D, Morales MJ, Concepción R, Del Castillo H, Marschall A, Delgado-Calva FA, Dejuán-Bitriá C, Pérez-Guzmán J, López-Soberón E, Palazuelos J, Álvarez-Antón S. Impact of Anemia on the Risk of Bleeding Following Percutaneous Coronary Interventions in Patients  $\geq 75$  Years of Age. *Am J Cardiol* 2020;**125**(8):1142-1147.
95. Choi KH, Song YB, Lee JM, Park TK, Yang JH, Choi JH, Choi SH, Oh JH, Cho DK, Lee JB, Doh JH, Kim SH, Jeong JO, Bae JH, Kim BO, Cho JH, Suh IW, Kim DI, Park HK, Park JS, Choi WG, Lee WS, Gwon HC, Hahn JY. Clinical Usefulness of PRECISE-DAPT Score for Predicting Bleeding Events in Patients With Acute Coronary Syndrome Undergoing Percutaneous Coronary Intervention: An Analysis From the SMART-DATE Randomized Trial. *Circ Cardiovasc Interv* 2020;**13**(5):e008530.
96. Gragnano F, Heg D, Franzone A, McFadden EP, Leonardi S, Piccolo R, Vranckx P, Branca M, Serruys PW, Benit E, Liebetau C, Janssens L, Ferrario M, Zurakowski A, Diletti R, Dominici M, Huber K, Slagboom T, Buszman P, Bolognese L, Tumscitz C, Bryniarski K, Aminian A, Vrolix M, Petrov I, Garg S, Naber C, Prokopczuk J, Hamm C, Steg PG, Jüni P, Windecker S, Valgimigli M. PRECISE-DAPT score for bleeding risk prediction in patients on dual or single antiplatelet regimens: insights from the GLOBAL LEADERS and GLASSY. *Eur Heart J Cardiovasc Pharmacother* 2020.
97. Rozemeijer R, van Bezouwen WP, van Hemert ND, Damen JA, Koudstaal S, Stein M, Leenders GE, Timmers L, Kraaijeveld AO, Roes K, Agostoni P, Doevendans PA, Stella PR, Voskuil M. Direct comparison of predictive performance of PRECISE-DAPT versus PARIS versus CREDO-Kyoto: a subanalysis of the ReCre8 trial. *Neth Heart J* 2020.
98. Marquis-Gravel G, Neely ML, Valgimigli M, Costa F, Van Klaveren D, Altner R, Bhatt DL, Armstrong PW, Fox KAA, White HD, Ohman EM, Roe MT. Long-Term Bleeding Risk Prediction with Dual Antiplatelet Therapy After Acute Coronary Syndromes Treated Without Revascularization. *Circ Cardiovasc Qual Outcomes* 2020;**13**(9):e006582.
99. Piccolo R, Gargiulo G, Franzone A, Santucci A, Ariotti S, Baldo A, Tumscitz C, Moschovitis A, Windecker S, Valgimigli M. Use of the Dual-Antiplatelet Therapy Score to Guide Treatment Duration After Percutaneous Coronary Intervention. *Ann Intern Med* 2017;**167**(1):17-25.
100. Harada Y, Michel J, Lohaus R, Mayer K, Emmer R, Lahmann AL, Colleran R, Giacoppo D, Wolk A, Ten Berg JM, Neumann FJ, Han Y, Adriaenssens T, Tolg R, Seyfarth M, Maeng M, Zrenner B, Jacobshagen C, Wohrle J, Kufner S, Morath T, Ibrahim T, Bernlochner I, Fischer M, Schunkert H, Laugwitz KL, Mehilli J, Byrne RA, Kastrati A, Schulz-Schupke S. Validation of the DAPT score in patients randomized to 6 or 12 months clopidogrel after predominantly second-generation drug-eluting stents. *Thromb Haemost* 2017;**117**(10):1989-1999.
101. Yoshikawa Y, Shiomi H, Watanabe H, Natsuaki M, Kondo H, Tamura T, Nakagawa Y, Morimoto T, Kimura T. Validating Utility of Dual Antiplatelet Therapy Score in a Large Pooled Cohort From 3 Japanese Percutaneous Coronary Intervention Studies. *Circulation* 2018;**137**(6):551-562.
102. Witberg G, Zusman O, Bental T, Plakht I, Gabbay H, Gerber Y, Kornowski R. Validation of the DAPT score in real-world patients undergoing coronary stent implantation. *Int J Cardiol* 2019.

103. Jang JY, Jung HW, Lee BK, Shin DH, Kim JS, Hong SJ, Ahn CM, Kim BK, Ko YG, Choi D, Hong MK, Park KW, Gwon HC, Kim HS, Kwon HM, Jang Y. Impact of PRECISE-DAPT and DAPT Scores on Dual Antiplatelet Therapy Duration After 2nd Generation Drug-Eluting Stent Implantation. *Cardiovasc Drugs Ther* 2020.
104. Gao G, Zhao Y, Zhang D, Song C, Song W, Feng L, Zhu C, Xu B, Yin D, Dou K. Validation of the DAPT score in large-scale consecutive and contemporary patients population in the real world. *Platelets* 2020:1-8.
105. Brener SJ, Kirtane AJ, Rinaldi MJ, Stuckey TD, Witzenbichler B, Weisz G, Neumann FJ, Metzger DC, Henry TD, Cox DA, Duffy PL, Mazzaferri EL, Jr., Gurbel PA, Brodie BR, Mehran R, McAndrew T, Stone GW. Prediction of Ischemic and Bleeding Events Using the Dual Antiplatelet Therapy Score in an Unrestricted Percutaneous Coronary Intervention Population. *Circ Cardiovasc Interv* 2018;**11**(10):e006853.
106. Song L, Guan C, Yan H, Qiao S, Wu Y, Yuan J, Dou K, Yang Y, Dangas GD, Xu B. Validation of contemporary risk scores in predicting coronary thrombotic events and major bleeding in patients with acute coronary syndrome after drug-eluting stent implantations. *Catheter Cardiovasc Interv* 2018;**91**(S1):573-581.
107. Ueda P, Jernberg T, James S, Alfredsson J, Erlinge D, Omerovic E, Persson J, Ravn-Fischer A, Tornvall P, Svennblad B, Varenhorst C. External Validation of the DAPT Score in a Nationwide Population. *J Am Coll Cardiol* 2018;**72**(10):1069-1078.
108. Veron-Esquivel D, Batiz-Armenta F, Cazares-Diazleal AC, Oviedo-Moguel S, Jarvio-Fernandez SM, Arce-Gonzalez JM, Ivey-Miranda JB. Validation of DAPT score for prolonged dual antiplatelet therapy in patients with acute myocardial infarction. *Hellenic J Cardiol* 2019;**60**(5):296-302.
109. Bonello L, Camoin-Jau L, Armero S, Com O, Arques S, Burignat-Bonello C, Giacomoni MP, Bonello R, Collet F, Rossi P, Barragan P, Dignat-George F, Paganelli F. Tailored clopidogrel loading dose according to platelet reactivity monitoring to prevent acute and subacute stent thrombosis. *Am J Cardiol* 2009;**103**(1):5-10.
110. Valgimigli M, Campo G, de Cesare N, Meliga E, Vranckx P, Furgieri A, Angiolillo DJ, Sabatè M, Hamon M, Repetto A, Colangelo S, Brugaletta S, Parrinello G, Percoco G, Ferrari R. Intensifying platelet inhibition with tirofiban in poor responders to aspirin, clopidogrel, or both agents undergoing elective coronary intervention: results from the double-blind, prospective, randomized Tailoring Treatment with Tirofiban in Patients Showing Resistance to Aspirin and/or Resistance to Clopidogrel study. *Circulation* 2009;**119**(25):3215-22.
111. Price MJ, Berger PB, Teirstein PS, Tanguay JF, Angiolillo DJ, Spriggs D, Puri S, Robbins M, Garratt KN, Bertrand OF, Stillabower ME, Aragon JR, Kandzari DE, Stinis CT, Lee MS, Manoukian SV, Cannon CP, Schork NJ, Topol EJ. Standard- vs high-dose clopidogrel based on platelet function testing after percutaneous coronary intervention: the GRAVITAS randomized trial. *Jama* 2011;**305**(11):1097-105.
112. Wang XD, Zhang DF, Zhuang SW, Lai Y. Modifying clopidogrel maintenance doses according to vasodilator-stimulated phosphoprotein phosphorylation index improves clinical outcome in patients with clopidogrel resistance. *Clin Cardiol* 2011;**34**(5):332-8.
113. Trenk D, Stone GW, Gawaz M, Kastrati A, Angiolillo DJ, Muller U, Richardt G, Jakubowski JA, Neumann FJ. A randomized trial of prasugrel versus clopidogrel in patients with high platelet reactivity on clopidogrel after elective percutaneous coronary intervention with implantation of drug-eluting stents: results of the TRIGGER-PCI (Testing Platelet Reactivity In Patients Undergoing Elective Stent Placement on Clopidogrel to Guide Alternative Therapy With Prasugrel) study. *J Am Coll Cardiol* 2012;**59**(24):2159-64.
114. Collet JP, Cuisset T, Rangé G, Cayla G, Elhadad S, Pouillot C, Henry P, Motreff P, Carrié D, Boueri Z, Belle L, Van Belle E, Rousseau H, Aubry P, Monségu J, Sabouret P, O'Connor SA, Abtan J, Kerneis M, Saint-Etienne C, Barthélémy O, Beygui F, Silvain J, Vicaut E, Montalescot G. Bedside monitoring to adjust antiplatelet therapy for coronary stenting. *N Engl J Med* 2012;**367**(22):2100-9.
115. Cayla G, Cuisset T, Silvain J, Leclercq F, Manzo-Silberman S, Saint-Etienne C, Delarche N, Bellemain-Appaix A, Range G, El Mahmoud R, Carrié D, Belle L, Souteyrand G, Aubry P, Sabouret P, du Fretay XH, Beygui F, Bonnet JL, Lattuca B, Pouillot C, Varenne O, Boueri Z, Van Belle E, Henry P, Motreff P, Elhadad S, Salem JE, Abtan J, Rousseau H, Collet JP, Vicaut E, Montalescot G. Platelet function monitoring to adjust antiplatelet therapy in elderly patients stented for an acute coronary

- syndrome (ANTARCTIC): an open-label, blinded-endpoint, randomised controlled superiority trial. *Lancet* 2016;**388**(10055):2015-2022.
116. Sibbing D, Aradi D, Jacobshagen C, Gross L, Trenk D, Geisler T, Orban M, Hadamitzky M, Merkely B, Kiss RG, Komocsi A, Dezsai CA, Holdt L, Felix SB, Parma R, Klopotoski M, Schwinger RHG, Rieber J, Huber K, Neumann FJ, Koltowski L, Mehilli J, Huczek Z, Massberg S. Guided de-escalation of antiplatelet treatment in patients with acute coronary syndrome undergoing percutaneous coronary intervention (TROPICAL-ACS): a randomised, open-label, multicentre trial. *Lancet* 2017;**390**(10104):1747-1757.
117. Tang YD, Wang W, Yang M, Zhang K, Chen J, Qiao S, Yan H, Wu Y, Huang X, Xu B, Gao R, Yang Y. Randomized Comparisons of Double-Dose Clopidogrel or Adjunctive Cilostazol Versus Standard Dual Antiplatelet in Patients With High Posttreatment Platelet Reactivity: Results of the CREATIVE Trial. *Circulation* 2018;**137**(21):2231-2245.
118. Roberts JD, Wells GA, Le May MR, Labinaz M, Glover C, Froeschl M, Dick A, Marquis J-F, O'Brien E, Goncalves S, Druce I, Stewart A, Gollob MH, So DYF. Point-of-care genetic testing for personalisation of antiplatelet treatment (RAPID GENE): a prospective, randomised, proof-of-concept trial. *The Lancet* 2012;**379**(9827):1705-1711.
119. Xie X, Ma YT, Yang YN, Li XM, Zheng YY, Ma X, Fu ZY, Ba B, Li Y, Yu ZX, Chen Y, Chen BD, Liu F, Huang Y, Liu C, Baituola G. Personalized antiplatelet therapy according to CYP2C19 genotype after percutaneous coronary intervention: a randomized control trial. *Int J Cardiol* 2013;**168**(4):3736-40.
120. Notarangelo FM, Maglietta G, Bevilacqua P, Cereda M, Merlini PA, Villani GQ, Moruzzi P, Patrizi G, Malagoli Tagliazucchi G, Crocamo A, Guidorossi A, Pigazzani F, Nicosia E, Paoli G, Bianchessi M, Comelli MA, Caminiti C, Ardissino D. Pharmacogenomic Approach to Selecting Antiplatelet Therapy in Patients With Acute Coronary Syndromes: The PHARMCLO Trial. *J Am Coll Cardiol* 2018;**71**(17):1869-1877.
121. Claassens DMF, Vos GJA, Bergmeijer TO, Hermanides RS, van 't Hof AWJ, van der Harst P, Barbato E, Morisco C, Tjon Joe Gin RM, Asselbergs FW, Mosterd A, Herrman JR, Dewilde WJM, Janssen PWA, Kelder JC, Postma MJ, de Boer A, Boersma C, Deneer VHM, Ten Berg JM. A Genotype-Guided Strategy for Oral P2Y<sub>12</sub> Inhibitors in Primary PCI. *N Engl J Med* 2019;**381**(17):1621-1631.
122. Pereira NL, Farkouh ME, So D, Lennon R, Geller N, Mathew V, Bell M, Bae J-H, Jeong MH, Chavez I, Gordon P, Abbott JD, Cagin C, Baudhuin L, Fu Y-P, Goodman SG, Hasan A, Iturriaga E, Lerman A, Sidhu M, Tanguay J-F, Wang L, Weinshilboum R, Welsh R, Rosenberg Y, Bailey K, Rihal C. Effect of Genotype-Guided Oral P2Y<sub>12</sub> Inhibitor Selection vs Conventional Clopidogrel Therapy on Ischemic Outcomes After Percutaneous Coronary Intervention: The TAILOR-PCI Randomized Clinical Trial. *JAMA* 2020;**324**(8):761-771.
